# Supplementary material for: Characterization and comprehensive genome analysis of novel bacteriophage, vB_Kpn_ZCKp20p, with lytic and anti-biofilm potential against clinical multidrug-resistant Klebsiella pneumoniae
Source: PubMed Central journal article supplement (PMC9901506; doi:10.3389/fcimb.2023.1077995), 2023-01-23
Supplement: DataSheet_1.pdf [file DataSheet_1.pdf]

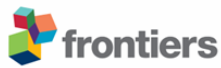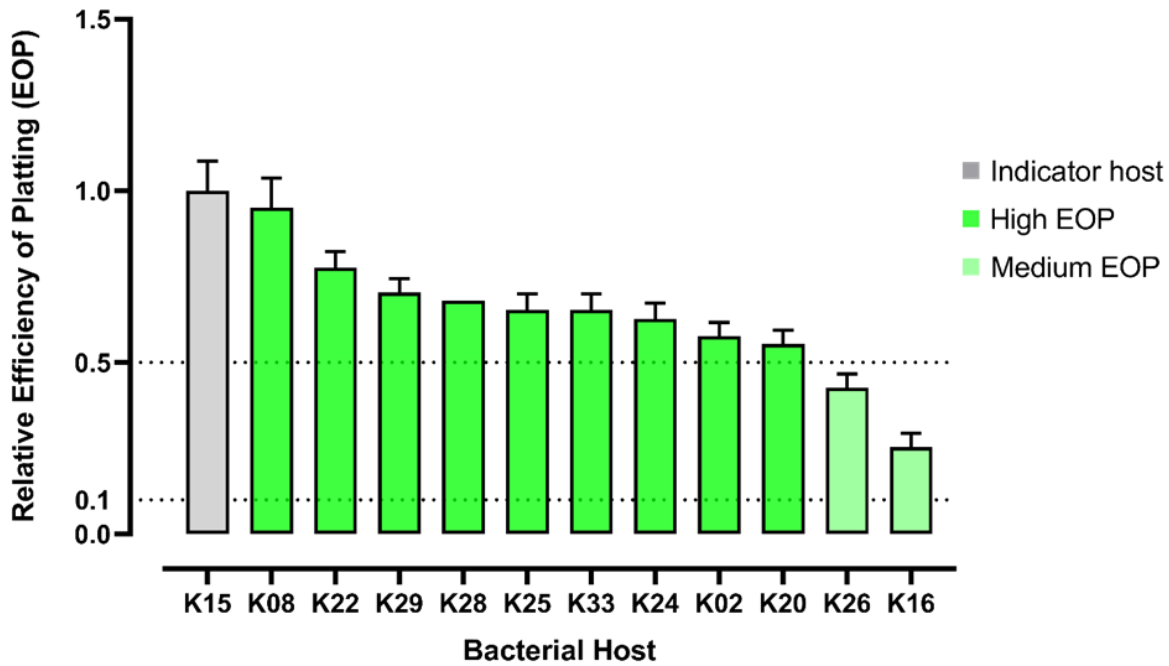

**Supplementary Figure S1.** Relative efficiency of plating (EOP) of phage vB\_Kpn\_ZCKp20p host range, calculated according to Kutter, 2009. The indicator host of the highest EOP is represented by a gray bar. The relative EOP of all other bacterial hosts was estimated as a ratio to the indicator host. Phage titers were determined by the Double Agar Overlay Plaque assay. The mean of triplicate results of each bacterial host was plotted, and error bars represent their standard deviations.

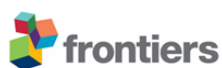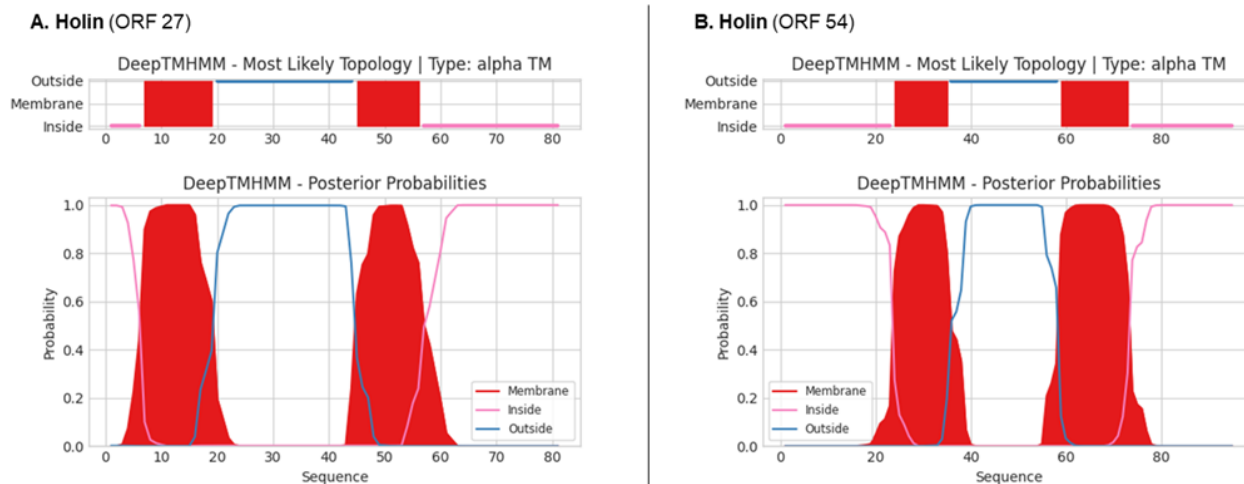

**Supplementary Figure S2. Predicted topology of ORFs 27 and 54 (putative class II holins).**

DeepTMHMM was used to predict the topology of ORF 27 (A) and ORF 54 (B). The top part of each chart represents the topology of predicted domains in correspondence to the amino acid sequence: transmembrane (in red), intracellular (in pink), and extracellular (in blue). The probability of predicted topology is presented in the bottom part. The topologies of holin in ORFs 27 and 54 were predicted by 100%.

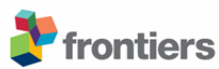**Supplementary Table S1. List of antimicrobial agents and their classes**

| Antimicrobial agent           | Class                        | Abbreviation | Concentration* |
|-------------------------------|------------------------------|--------------|----------------|
| Piperacillin                  | Penicillins                  | PRL          | 100 µg         |
| Piperacillin-tazobactam       | Beta-Lactam Combination      | TZP          | 100/10 µg      |
| Cefuroxime                    | 2nd Generation Cephalosporin | CXM          | 30 µg          |
| Cefepime                      | 4th Generation Cephalosporin | FEB          | 30 µg          |
| Doripenem                     | Carbapenem                   | DOR          | 10 µg          |
| Meropenem                     |                              | MPM          | 10 µg          |
| Ertapenem                     |                              | ETP          | 10 µg          |
| Imipenem                      |                              | IMP          | 10 µg          |
| Aztreonam                     | Monobactam                   | ATM          | 30 µg          |
| Azithromycin                  | Macrolides                   | AZM          | 15 µg          |
| Tobramycin                    | Aminoglycoside               | TOB          | 10 µg          |
| Kanamycin                     |                              | K            | 30 µg          |
| Gentamicin                    |                              | CN           | 10 µg          |
| Amikacin                      |                              | AK           | 30 µg          |
| Ciprofloxacin                 | Fluoroquinolone              | CIP          | 5 µg           |
| Levofloxacin                  |                              | LEV          | 5 µg           |
| Trimethoprim-Sulfamethoxazole | Sulfonamides                 | SXT          | 1.25/23.75 µg  |
| Doxycycline                   | Tetracycline                 | DOX          | 30 µg          |

\* Oxoid, UK manufactured all mentioned antibiotic discs.

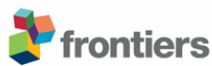

**Supplementary Table S2. Primer sequences and sizes of PCR products for virulence gene screening**

| Gene         | Protein: name and function                                                                                  | Gene Conservatio | Primer Sequence Sequence (5' - 3') | Ta (°C) | Amplicon Size |
|--------------|-------------------------------------------------------------------------------------------------------------|------------------|------------------------------------|---------|---------------|
| <i>entB</i>  | It encodes isochorismatase for the biosynthesis of the siderophore enterobactin (Ent).                      | Core Genome      | AAACAGCGCGATGATGGAGA               | 52.5    | 222           |
|              |                                                                                                             |                  | ACCAGCACGGTATCGTCTTC               |         |               |
| <i>iutA</i>  | It encodes ferric aerobactin receptor, responsible for aerobactin (Iuc) transport and iron ion homeostasis. | Accessory Genome | GTTGCGATTCTACCCGTTCC               | 53      | 248           |
|              |                                                                                                             |                  | GCCCCGGTGGTGTAATCTTC               |         |               |
| <i>irp2*</i> | It encodes the synthetase (HMWP2) for the siderophore yersiniabactin (Ybt) biosynthesis.                    | Accessory Genome | GCTACAATGGGACAGCAACGAC             | 58      | 230           |
|              |                                                                                                             |                  | GCAGAGCGATACGGAAAATGC              |         |               |
| <i>fimH</i>  | It encodes type 1 fimbriae, cell adhesion.                                                                  | Core Genome      | GTCGAGTTTTTTCAGGCACCG              | 52      | 259           |
|              |                                                                                                             |                  | CACGTCGTTGTTGGCGTAAA               |         |               |
| <i>mrkD</i>  | It encodes type 3 fimbriae, cell adhesion and biofilm formation.                                            | Core Genome      | CACCTCCTACGACTGGGAGA               | 54      | 435           |
|              |                                                                                                             |                  | AGCGGTATGGTGATGTAGCG               |         |               |

\* All primers are designed specifically for this study, except *irp2* primers, which were previously designed (Garza-Ramos *et al.*, 2018).

The thermocycler (BIO-RAD T100, Singapore) conditions were adjusted to 5 min for both the initial denaturation time at 95°C and the final extension time at 72°C, and 35 cycles of reaction were implemented.

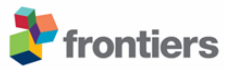

**Supplementary Table S3. Levels of the relative efficiency of plating**

| EOP Level         | The ratio of plaque count |              |
|-------------------|---------------------------|--------------|
|                   | From                      | To           |
| High production   | $\geq 0.5$                | $\geq 1$     |
| Medium production | 0.1                       | $< 0.5$      |
| Low production    | $0.001 <$                 | $< 0.1$      |
| No production     | 0                         | $\leq 0.001$ |

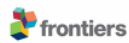Supplementary Table S4. Annotated CDS of *Klebsiella* phage vB\_Kpn\_ZCKp20p

| Colour key in the genomic map | ORF/CDS No. | Position (nt) |       | Length bp | Strand | Product                             | Predicted function                                    | Functional Category  | RAST                                | InterPro                            | HHPred                              | UNIPROT                             | Blastp                              |
|-------------------------------|-------------|---------------|-------|-----------|--------|-------------------------------------|-------------------------------------------------------|----------------------|-------------------------------------|-------------------------------------|-------------------------------------|-------------------------------------|-------------------------------------|
|                               |             | Start         | Stop  |           |        |                                     |                                                       |                      |                                     |                                     |                                     |                                     |                                     |
|                               | 1           | 289           | 474   | 186       | (+)    | Hypothetical protein                | Unknown                                               | Hypothetical protein | <input checked="" type="checkbox"/> | <input type="checkbox"/>            | <input type="checkbox"/>            | <input type="checkbox"/>            | <input type="checkbox"/>            |
|                               | 2           | 490           | 768   | 279       | (+)    | Hypothetical protein                | Unknown                                               | Hypothetical protein | <input checked="" type="checkbox"/> | <input type="checkbox"/>            | <input type="checkbox"/>            | <input type="checkbox"/>            | <input type="checkbox"/>            |
|                               | 3           | 775           | 1158  | 384       | (+)    | Hypothetical protein                | Unknown                                               | Hypothetical protein | <input checked="" type="checkbox"/> | <input type="checkbox"/>            | <input type="checkbox"/>            | <input type="checkbox"/>            | <input type="checkbox"/>            |
|                               | 4           | 1155          | 1439  | 285       | (+)    | Hypothetical protein                | Unknown                                               | Hypothetical protein | <input checked="" type="checkbox"/> | <input type="checkbox"/>            | <input type="checkbox"/>            | <input type="checkbox"/>            | <input type="checkbox"/>            |
|                               | 5           | 1436          | 1795  | 360       | (+)    | Hypothetical protein                | Unknown                                               | Hypothetical protein | <input checked="" type="checkbox"/> | <input type="checkbox"/>            | <input type="checkbox"/>            | <input type="checkbox"/>            | <input type="checkbox"/>            |
|                               | 6           | 1795          | 1923  | 129       | (+)    | Hypothetical protein                | Unknown                                               | Hypothetical protein | <input checked="" type="checkbox"/> | <input type="checkbox"/>            | <input type="checkbox"/>            | <input type="checkbox"/>            | <input type="checkbox"/>            |
|                               | 7           | 1928          | 2779  | 852       | (+)    | Phage protein                       | Unknown                                               | Hypothetical protein | <input checked="" type="checkbox"/> | <input type="checkbox"/>            | <input type="checkbox"/>            | <input type="checkbox"/>            | <input type="checkbox"/>            |
|                               | 8           | 2776          | 2868  | 93        | (+)    | Hypothetical protein                | Unknown                                               | Hypothetical protein | <input checked="" type="checkbox"/> | <input type="checkbox"/>            | <input type="checkbox"/>            | <input type="checkbox"/>            | <input type="checkbox"/>            |
|                               | 9           | 2872          | 3030  | 159       | (+)    | Hypothetical protein                | Unknown                                               | Hypothetical protein | <input checked="" type="checkbox"/> | <input type="checkbox"/>            | <input type="checkbox"/>            | <input type="checkbox"/>            | <input type="checkbox"/>            |
|                               | 10          | 3030          | 3224  | 195       | (+)    | Hypothetical protein                | Unknown                                               | Hypothetical protein | <input checked="" type="checkbox"/> | <input type="checkbox"/>            | <input type="checkbox"/>            | <input type="checkbox"/>            | <input type="checkbox"/>            |
|                               | 11          | 3304          | 3753  | 450       | (+)    | Phage protein                       | Unknown                                               | Hypothetical protein | <input checked="" type="checkbox"/> | <input type="checkbox"/>            | <input type="checkbox"/>            | <input type="checkbox"/>            | <input type="checkbox"/>            |
|                               | 12          | 3743          | 5167  | 1425      | (+)    | Phage terminase, large subunit      | Endonuclease, Hydrolase, Nuclease                     | DNA genome packaging | <input checked="" type="checkbox"/> | <input type="checkbox"/>            | <input type="checkbox"/>            | <input type="checkbox"/>            | <input type="checkbox"/>            |
|                               | 13          | 5188          | 5478  | 291       | (-)    | Hypothetical protein                | Unknown                                               | Hypothetical protein | <input checked="" type="checkbox"/> | <input type="checkbox"/>            | <input type="checkbox"/>            | <input type="checkbox"/>            | <input type="checkbox"/>            |
|                               | 14          | 5567          | 5806  | 240       | (+)    | Phage protein                       | Unknown                                               | Hypothetical protein | <input checked="" type="checkbox"/> | <input type="checkbox"/>            | <input type="checkbox"/>            | <input type="checkbox"/>            | <input type="checkbox"/>            |
|                               | 15          | 5803          | 5997  | 195       | (+)    | Hypothetical protein                | Unknown                                               | Hypothetical protein | <input checked="" type="checkbox"/> | <input type="checkbox"/>            | <input type="checkbox"/>            | <input type="checkbox"/>            | <input type="checkbox"/>            |
|                               | 16          | 5997          | 6185  | 189       | (+)    | Hypothetical protein                | Unknown                                               | Hypothetical protein | <input checked="" type="checkbox"/> | <input type="checkbox"/>            | <input type="checkbox"/>            | <input type="checkbox"/>            | <input type="checkbox"/>            |
|                               | 17          | 6185          | 6385  | 201       | (+)    | Hypothetical protein                | Unknown                                               | Hypothetical protein | <input checked="" type="checkbox"/> | <input type="checkbox"/>            | <input type="checkbox"/>            | <input type="checkbox"/>            | <input type="checkbox"/>            |
|                               | 18          | 6395          | 6670  | 276       | (+)    | Hypothetical protein                | Unknown                                               | Hypothetical protein | <input checked="" type="checkbox"/> | <input type="checkbox"/>            | <input type="checkbox"/>            | <input type="checkbox"/>            | <input type="checkbox"/>            |
|                               | 19          | 6788          | 6907  | 120       | (+)    | Hypothetical protein                | Unknown                                               | Hypothetical protein | <input checked="" type="checkbox"/> | <input type="checkbox"/>            | <input type="checkbox"/>            | <input type="checkbox"/>            | <input type="checkbox"/>            |
|                               | 20          | 6955          | 8409  | 1455      | (+)    | Phage portal (connector) protein    | Genome packaging, neck/tail attachment                | Capsid structure     | <input checked="" type="checkbox"/> | <input type="checkbox"/>            | <input type="checkbox"/>            | <input type="checkbox"/>            | <input type="checkbox"/>            |
|                               | 21          | 8390          | 9334  | 945       | (+)    | Phage minor capsid protein          | Reinforced post-assembly                              | Capsid structure     | <input type="checkbox"/>            | <input checked="" type="checkbox"/> | <input checked="" type="checkbox"/> | <input checked="" type="checkbox"/> | <input checked="" type="checkbox"/> |
|                               | 22          | 9342          | 9464  | 123       | (-)    | Hypothetical protein                | Unknown                                               | Hypothetical protein | <input checked="" type="checkbox"/> | <input type="checkbox"/>            | <input type="checkbox"/>            | <input type="checkbox"/>            | <input type="checkbox"/>            |
|                               | 23          | 9464          | 10327 | 864       | (-)    | Hypothetical protein                | Unknown                                               | Hypothetical protein | <input checked="" type="checkbox"/> | <input type="checkbox"/>            | <input type="checkbox"/>            | <input type="checkbox"/>            | <input type="checkbox"/>            |
|                               | 24          | 10324         | 10455 | 132       | (-)    | Hypothetical protein                | Unknown                                               | Hypothetical protein | <input checked="" type="checkbox"/> | <input type="checkbox"/>            | <input type="checkbox"/>            | <input type="checkbox"/>            | <input type="checkbox"/>            |
|                               | 25          | 10455         | 10745 | 291       | (-)    | Hypothetical protein                | Unknown                                               | Hypothetical protein | <input checked="" type="checkbox"/> | <input type="checkbox"/>            | <input type="checkbox"/>            | <input type="checkbox"/>            | <input type="checkbox"/>            |
|                               | 26          | 10844         | 11281 | 438       | (+)    | Phage endolysin (EC 3.2.1.17)       | Peptidoglycan hydrolases                              | Host cell wall lysis | <input checked="" type="checkbox"/> | <input type="checkbox"/>            | <input type="checkbox"/>            | <input type="checkbox"/>            | <input type="checkbox"/>            |
|                               | 27          | 11278         | 11523 | 246       | (+)    | Holin                               | Forming holes in the inner membrane of host cell wall | Host cell wall lysis | <input type="checkbox"/>            | <input type="checkbox"/>            | <input type="checkbox"/>            | <input checked="" type="checkbox"/> | <input checked="" type="checkbox"/> |
|                               | 28          | 11498         | 11992 | 495       | (+)    | Phage endopeptidase (EC 3.4.-.-) Rz | Peptidoglycan hydrolases                              | Host cell wall lysis | <input checked="" type="checkbox"/> | <input type="checkbox"/>            | <input type="checkbox"/>            | <input type="checkbox"/>            | <input type="checkbox"/>            |
|                               | 29          | 11982         | 12125 | 144       | (+)    | Hypothetical protein                | Unknown                                               | Hypothetical protein | <input checked="" type="checkbox"/> | <input type="checkbox"/>            | <input type="checkbox"/>            | <input type="checkbox"/>            | <input type="checkbox"/>            |
|                               | 30          | 12223         | 12462 | 240       | (-)    | Hypothetical protein                | Unknown                                               | Hypothetical protein | <input checked="" type="checkbox"/> | <input type="checkbox"/>            | <input type="checkbox"/>            | <input type="checkbox"/>            | <input type="checkbox"/>            |
|                               | 31          | 12455         | 12667 | 213       | (-)    | Hypothetical protein                | Unknown                                               | Hypothetical protein | <input checked="" type="checkbox"/> | <input type="checkbox"/>            | <input type="checkbox"/>            | <input type="checkbox"/>            | <input type="checkbox"/>            |
|                               | 32          | 12667         | 13053 | 387       | (-)    | Hypothetical protein                | Unknown                                               | Hypothetical protein | <input checked="" type="checkbox"/> | <input type="checkbox"/>            | <input type="checkbox"/>            | <input type="checkbox"/>            | <input type="checkbox"/>            |
|                               | 33          | 13056         | 13250 | 195       | (-)    | Hypothetical protein                | Unknown                                               | Hypothetical protein | <input checked="" type="checkbox"/> | <input type="checkbox"/>            | <input type="checkbox"/>            | <input type="checkbox"/>            | <input type="checkbox"/>            |
|                               | 34          | 13250         | 13450 | 201       | (-)    | Hypothetical protein                | Unknown                                               | Hypothetical protein | <input checked="" type="checkbox"/> | <input type="checkbox"/>            | <input type="checkbox"/>            | <input type="checkbox"/>            | <input type="checkbox"/>            |
|                               | 35          | 13547         | 13762 | 216       | (+)    | Hypothetical protein                | Unknown                                               | Hypothetical protein | <input checked="" type="checkbox"/> | <input type="checkbox"/>            | <input type="checkbox"/>            | <input type="checkbox"/>            | <input type="checkbox"/>            |

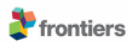Supplementary Table S4. Annotated CDS of *Klebsiella* phage vB\_Kpn\_ZCKp20p

| Colour key in the genomic map | ORF/CDS No. | Position (nt) |       | Length bp | Strand | Product                                                            | Predicted function                                                                                                    | Functional Category      | RAST                                | InterPro                            | HHPred                              | UNIPROT                             | Blastp                              |
|-------------------------------|-------------|---------------|-------|-----------|--------|--------------------------------------------------------------------|-----------------------------------------------------------------------------------------------------------------------|--------------------------|-------------------------------------|-------------------------------------|-------------------------------------|-------------------------------------|-------------------------------------|
|                               |             | Start         | Stop  |           |        |                                                                    |                                                                                                                       |                          |                                     |                                     |                                     |                                     |                                     |
|                               | 36          | 13846         | 14037 | 192       | (+)    | Hypothetical protein                                               | Unknown                                                                                                               | Hypothetical protein     | <input checked="" type="checkbox"/> | <input type="checkbox"/>            | <input type="checkbox"/>            | <input type="checkbox"/>            | <input type="checkbox"/>            |
|                               | 37          | 14034         | 14258 | 225       | (+)    | Hypothetical protein                                               | Unknown                                                                                                               | Hypothetical protein     | <input checked="" type="checkbox"/> | <input type="checkbox"/>            | <input type="checkbox"/>            | <input type="checkbox"/>            | <input type="checkbox"/>            |
|                               | 38          | 14255         | 14491 | 237       | (+)    | Zinc-binding domain (ZBD) of primase-helicase                      | Template recognition, a polymerase domain (catalytic core), and a domain that interacts with the replicative helicase | DNA replication / repair | <input type="checkbox"/>            | <input type="checkbox"/>            | <input type="checkbox"/>            | <input checked="" type="checkbox"/> | <input checked="" type="checkbox"/> |
|                               | 39          | 14481         | 14951 | 471       | (+)    | Hypothetical protein                                               | Unknown                                                                                                               | Hypothetical protein     | <input checked="" type="checkbox"/> | <input type="checkbox"/>            | <input type="checkbox"/>            | <input type="checkbox"/>            | <input type="checkbox"/>            |
|                               | 40          | 14939         | 15229 | 291       | (+)    | Hypothetical protein                                               | Unknown                                                                                                               | Hypothetical protein     | <input checked="" type="checkbox"/> | <input type="checkbox"/>            | <input type="checkbox"/>            | <input type="checkbox"/>            | <input type="checkbox"/>            |
|                               | 41          | 15230         | 15574 | 345       | (+)    | Phage protein                                                      | Unknown                                                                                                               | Hypothetical protein     | <input checked="" type="checkbox"/> | <input type="checkbox"/>            | <input type="checkbox"/>            | <input type="checkbox"/>            | <input type="checkbox"/>            |
|                               | 42          | 15757         | 17157 | 1401      | (+)    | Unclassified head protein / Procapsid Core Protein Serine Protease | Serine protease involved in capsid assembly and maturation                                                            | Capsid assembly          | <input checked="" type="checkbox"/> | <input type="checkbox"/>            | <input checked="" type="checkbox"/> | <input checked="" type="checkbox"/> | <input checked="" type="checkbox"/> |
|                               | 43          | 17157         | 17621 | 465       | (+)    | Capsid decoration protein                                          | Stabilizing capsid structure                                                                                          | Capsid assembly          | <input type="checkbox"/>            | <input type="checkbox"/>            | <input checked="" type="checkbox"/> | <input checked="" type="checkbox"/> | <input checked="" type="checkbox"/> |
|                               | 44          | 17633         | 18721 | 1089      | (+)    | Unclassified head protein / Major capsid protein                   | Capsid assembly                                                                                                       | Capsid structure         | <input checked="" type="checkbox"/> | <input type="checkbox"/>            | <input checked="" type="checkbox"/> | <input checked="" type="checkbox"/> | <input checked="" type="checkbox"/> |
|                               | 45          | 18764         | 18958 | 195       | (+)    | Hypothetical protein                                               | Unknown                                                                                                               | Hypothetical protein     | <input checked="" type="checkbox"/> | <input type="checkbox"/>            | <input type="checkbox"/>            | <input type="checkbox"/>            | <input type="checkbox"/>            |
|                               | 46          | 19000         | 19818 | 819       | (+)    | Hypothetical protein                                               | Unknown                                                                                                               | Hypothetical protein     | <input checked="" type="checkbox"/> | <input type="checkbox"/>            | <input type="checkbox"/>            | <input type="checkbox"/>            | <input type="checkbox"/>            |
|                               | 47          | 19848         | 20030 | 183       | (-)    | Hypothetical protein                                               | Unknown                                                                                                               | Hypothetical protein     | <input checked="" type="checkbox"/> | <input type="checkbox"/>            | <input type="checkbox"/>            | <input type="checkbox"/>            | <input type="checkbox"/>            |
|                               | 48          | 20033         | 20569 | 537       | (-)    | DNA polymerase III beta subunit (EC 2.7.7.7)                       | DNA replication                                                                                                       | DNA replication / repair | <input checked="" type="checkbox"/> | <input type="checkbox"/>            | <input type="checkbox"/>            | <input type="checkbox"/>            | <input type="checkbox"/>            |
|                               | 49          | 20566         | 20742 | 177       | (-)    | Hypothetical protein                                               | Unknown                                                                                                               | Hypothetical protein     | <input checked="" type="checkbox"/> | <input type="checkbox"/>            | <input type="checkbox"/>            | <input type="checkbox"/>            | <input type="checkbox"/>            |
|                               | 50          | 20739         | 21086 | 348       | (-)    | Hypothetical protein                                               | Unknown                                                                                                               | Hypothetical protein     | <input checked="" type="checkbox"/> | <input type="checkbox"/>            | <input type="checkbox"/>            | <input type="checkbox"/>            | <input type="checkbox"/>            |
|                               | 51          | 21086         | 21901 | 816       | (-)    | Phage protein                                                      | Unknown                                                                                                               | Hypothetical protein     | <input checked="" type="checkbox"/> | <input type="checkbox"/>            | <input type="checkbox"/>            | <input type="checkbox"/>            | <input type="checkbox"/>            |
|                               | 52          | 21909         | 22025 | 117       | (-)    | ParB/RepB/SpoJ family partition protein                            | Transcriptional regulator                                                                                             | DNA replication / repair | <input type="checkbox"/>            | <input checked="" type="checkbox"/> | <input checked="" type="checkbox"/> | <input checked="" type="checkbox"/> | <input checked="" type="checkbox"/> |
|                               | 53          | 22022         | 22318 | 297       | (-)    | Hypothetical protein                                               | Unknown                                                                                                               | Hypothetical protein     | <input checked="" type="checkbox"/> | <input type="checkbox"/>            | <input type="checkbox"/>            | <input type="checkbox"/>            | <input type="checkbox"/>            |
|                               | 54          | 22543         | 22830 | 288       | (+)    | Holin                                                              | Forming holes in the inner membrane of host cell wall                                                                 | Host cell wall lysis     | <input type="checkbox"/>            | <input checked="" type="checkbox"/> | <input checked="" type="checkbox"/> | <input checked="" type="checkbox"/> | <input checked="" type="checkbox"/> |
|                               | 55          | 22808         | 23200 | 393       | (+)    | Phage protein                                                      | Unknown                                                                                                               | Hypothetical protein     | <input checked="" type="checkbox"/> | <input type="checkbox"/>            | <input type="checkbox"/>            | <input type="checkbox"/>            | <input type="checkbox"/>            |
|                               | 56          | 23197         | 23331 | 135       | (+)    | Hypothetical protein                                               | Unknown                                                                                                               | Hypothetical protein     | <input checked="" type="checkbox"/> | <input type="checkbox"/>            | <input type="checkbox"/>            | <input type="checkbox"/>            | <input type="checkbox"/>            |
|                               | 57          | 23319         | 23663 | 345       | (+)    | Minor capsid protein                                               | Unknown                                                                                                               | Capsid structure         | <input type="checkbox"/>            | <input type="checkbox"/>            | <input checked="" type="checkbox"/> | <input type="checkbox"/>            | <input checked="" type="checkbox"/> |
|                               | 58          | 23667         | 24083 | 417       | (+)    | Minor capsid protein                                               | Unknown                                                                                                               | Capsid structure         | <input type="checkbox"/>            | <input type="checkbox"/>            | <input checked="" type="checkbox"/> | <input type="checkbox"/>            | <input checked="" type="checkbox"/> |
|                               | 59          | 24132         | 25262 | 1131      | (-)    | Transposase: RNA-guided endonuclease TnpB family protein           | Guide RNA to bind and cleave guide-complementary DNA in a target adjacent motif-dependent manner                      | DNA genome packaging     | <input checked="" type="checkbox"/> | <input checked="" type="checkbox"/> | <input checked="" type="checkbox"/> | <input type="checkbox"/>            | <input checked="" type="checkbox"/> |
|                               | 60          | 25380         | 25763 | 384       | (+)    | Minor capsid protein                                               | Unknown                                                                                                               | Capsid structure         | <input type="checkbox"/>            | <input type="checkbox"/>            | <input checked="" type="checkbox"/> | <input type="checkbox"/>            | <input checked="" type="checkbox"/> |
|                               | 61          | 25770         | 25839 | 70        | (-)    | tRNA-Arg-TCT                                                       | Unknown                                                                                                               | tRNA                     | <input checked="" type="checkbox"/> |                                     |                                     |                                     |                                     |
|                               | 62          | 26297         | 27049 | 753       | (+)    | Phage fibritin (Wac) protein                                       | Chaperone involved in tail fiber contractile mechanical                                                               | Tail structure           | <input checked="" type="checkbox"/> | <input type="checkbox"/>            | <input type="checkbox"/>            | <input type="checkbox"/>            | <input type="checkbox"/>            |
|                               | 63          | 27089         | 27757 | 669       | (-)    | Phage protein (ACLAME family 536)                                  | Unknown                                                                                                               | Hypothetical protein     | <input checked="" type="checkbox"/> | <input type="checkbox"/>            | <input type="checkbox"/>            | <input type="checkbox"/>            | <input type="checkbox"/>            |

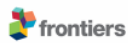Supplementary Table S4. Annotated CDS of *Klebsiella* phage vB\_Kpn\_ZCKp20p

| Colour key in the genomic map | ORF/CDS No. | Position (nt) |       | Length bp | Strand | Product                                                                         | Predicted function                                                       | Functional Category      | RAST                                | InterPro                            | HHPred                              | UNIPROT                             | Blastp                              |
|-------------------------------|-------------|---------------|-------|-----------|--------|---------------------------------------------------------------------------------|--------------------------------------------------------------------------|--------------------------|-------------------------------------|-------------------------------------|-------------------------------------|-------------------------------------|-------------------------------------|
|                               |             | Start         | Stop  |           |        |                                                                                 |                                                                          |                          |                                     |                                     |                                     |                                     |                                     |
|                               | 64          | 27757         | 28008 | 252       | (-)    | Hypothetical protein                                                            | Unknown                                                                  | Hypothetical protein     | <input checked="" type="checkbox"/> | <input type="checkbox"/>            | <input type="checkbox"/>            | <input type="checkbox"/>            | <input type="checkbox"/>            |
|                               | 65          | 28005         | 28490 | 486       | (-)    | Phage HNH homing endonuclease (ACLAME 27)                                       | Endonuclease, Hydrolase, Nuclease                                        | DNA genome packaging     | <input checked="" type="checkbox"/> | <input type="checkbox"/>            | <input type="checkbox"/>            | <input type="checkbox"/>            | <input type="checkbox"/>            |
|                               | 66          | 28477         | 28611 | 135       | (-)    | Hypothetical protein                                                            | Unknown                                                                  | Hypothetical protein     | <input checked="" type="checkbox"/> | <input type="checkbox"/>            | <input type="checkbox"/>            | <input type="checkbox"/>            | <input type="checkbox"/>            |
|                               | 67          | 28709         | 29416 | 708       | (+)    | Putative tail protein                                                           | Unknown                                                                  | Tail structure           | <input type="checkbox"/>            | <input type="checkbox"/>            | <input type="checkbox"/>            | <input type="checkbox"/>            | <input checked="" type="checkbox"/> |
|                               | 68          | 29416         | 32709 | 3294      | (+)    | Phage tail tape measure protein                                                 | Stopping the tail tube polymerization                                    | Tail structure           | <input checked="" type="checkbox"/> | <input type="checkbox"/>            | <input type="checkbox"/>            | <input type="checkbox"/>            | <input type="checkbox"/>            |
|                               | 69          | 32709         | 33179 | 471       | (+)    | Baseplate wedge protein                                                         | Tail assembly                                                            | Tail structure           | <input type="checkbox"/>            | <input type="checkbox"/>            | <input checked="" type="checkbox"/> | <input type="checkbox"/>            | <input checked="" type="checkbox"/> |
|                               | 70          | 33179         | 33649 | 471       | (+)    | Phage protein                                                                   | Unknown                                                                  | Hypothetical protein     | <input checked="" type="checkbox"/> | <input type="checkbox"/>            | <input type="checkbox"/>            | <input type="checkbox"/>            | <input type="checkbox"/>            |
|                               | 71          | 34018         | 36498 | 2481      | (+)    | Minor structural protein/Host specificity factor TipJ family phage tail protein | Unknown                                                                  | Tail structure           | <input type="checkbox"/>            | <input type="checkbox"/>            | <input type="checkbox"/>            | <input checked="" type="checkbox"/> | <input checked="" type="checkbox"/> |
|                               | 72          | 36537         | 39020 | 2484      | (+)    | Phage tailspike protein with depolymerase activity                              | Binding to the polymannose O-antigen accelerating adsorption of T5 phage | Tail structure           | <input type="checkbox"/>            | <input checked="" type="checkbox"/> | <input checked="" type="checkbox"/> | <input checked="" type="checkbox"/> | <input checked="" type="checkbox"/> |
|                               | 73          | 39061         | 39255 | 195       | (-)    | Hypothetical protein                                                            | Unknown                                                                  | Hypothetical protein     | <input checked="" type="checkbox"/> | <input type="checkbox"/>            | <input type="checkbox"/>            | <input type="checkbox"/>            | <input type="checkbox"/>            |
|                               | 74          | 39294         | 39797 | 504       | (-)    | Single-stranded DNA-binding protein, phage-associated                           | DNA binding protein                                                      | DNA Replication / Repair | <input checked="" type="checkbox"/> | <input type="checkbox"/>            | <input type="checkbox"/>            | <input type="checkbox"/>            | <input type="checkbox"/>            |
|                               | 75          | 39807         | 40844 | 1038      | (-)    | P-loop containing nucleoside triphosphate hydrolase (AAA domain)                | DNA metabolism                                                           | DNA genome packaging     | <input type="checkbox"/>            | <input checked="" type="checkbox"/> | <input type="checkbox"/>            | <input checked="" type="checkbox"/> | <input checked="" type="checkbox"/> |
|                               | 76          | 40841         | 41116 | 276       | (-)    | Hypothetical protein                                                            | Unknown                                                                  | Hypothetical protein     | <input checked="" type="checkbox"/> | <input type="checkbox"/>            | <input type="checkbox"/>            | <input type="checkbox"/>            | <input type="checkbox"/>            |
|                               | 77          | 41140         | 42096 | 957       | (-)    | Exodeoxyribonuclease VIII                                                       | Endonuclease, Hydrolase, Nuclease                                        | DNA replication / repair | <input checked="" type="checkbox"/> | <input type="checkbox"/>            | <input type="checkbox"/>            | <input type="checkbox"/>            | <input type="checkbox"/>            |
|                               | 78          | 42099         | 42542 | 444       | (-)    | Hypothetical protein                                                            | Unknown                                                                  | Hypothetical protein     | <input checked="" type="checkbox"/> | <input type="checkbox"/>            | <input type="checkbox"/>            | <input type="checkbox"/>            | <input type="checkbox"/>            |
|                               | 79          | 42590         | 43006 | 417       | (-)    | Nuclease                                                                        | Endonuclease, Hydrolase, Nuclease                                        | DNA genome packaging     | <input type="checkbox"/>            | <input checked="" type="checkbox"/> | <input type="checkbox"/>            | <input checked="" type="checkbox"/> | <input checked="" type="checkbox"/> |
|                               | 80          | 42993         | 44900 | 1908      | (-)    | Phage-associated DNA helicase                                                   | DNA and RNA metabolism                                                   | DNA replication / repair | <input checked="" type="checkbox"/> | <input type="checkbox"/>            | <input type="checkbox"/>            | <input type="checkbox"/>            | <input type="checkbox"/>            |
|                               | 81          | 44909         | 45682 | 774       | (-)    | Phage-associated homing endonuclease                                            | Endonuclease, Hydrolase, Nuclease                                        | DNA genome packaging     | <input type="checkbox"/>            | <input type="checkbox"/>            | <input type="checkbox"/>            | <input type="checkbox"/>            | <input type="checkbox"/>            |
|                               | 82          | 45755         | 46648 | 894       | (+)    | Phage-associated DNA primase/helicase                                           | DNA and RNA metabolism                                                   | DNA replication / repair | <input checked="" type="checkbox"/> | <input type="checkbox"/>            | <input type="checkbox"/>            | <input type="checkbox"/>            | <input type="checkbox"/>            |
|                               | 83          | 46662         | 46895 | 234       | (-)    | Activating signal cointegrator (Asch) domain protein                            | DNA and RNA metabolism                                                   | DNA transcription        | <input checked="" type="checkbox"/> | <input type="checkbox"/>            | <input type="checkbox"/>            | <input type="checkbox"/>            | <input type="checkbox"/>            |
|                               | 84          | 46892         | 48445 | 1554      | (-)    | Phage protein                                                                   | Unknown                                                                  | Hypothetical protein     | <input checked="" type="checkbox"/> | <input type="checkbox"/>            | <input type="checkbox"/>            | <input type="checkbox"/>            | <input type="checkbox"/>            |
|                               | 85          | 48445         | 48678 | 234       | (-)    | Hypothetical protein                                                            | Unknown                                                                  | Hypothetical protein     | <input checked="" type="checkbox"/> | <input type="checkbox"/>            | <input type="checkbox"/>            | <input type="checkbox"/>            | <input type="checkbox"/>            |



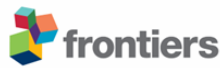

Supplementary Table S5. Phage Depolymerase Finder (PhageDPO) results

| ID                    | ANN7185 DPO Prediction (%) | ID                    | SVM4311 DPO Prediction (%) |
|-----------------------|----------------------------|-----------------------|----------------------------|
| fiG 2202568.10.peG.71 | 100                        | fiG 2202568.10.peG.71 | 100                        |
| fiG 2202568.10.peG.32 | 100                        | fiG 2202568.10.peG.70 | 98                         |
| fiG 2202568.10.peG.70 | 58                         | fiG 2202568.10.peG.46 | 83                         |
| fiG 2202568.10.peG.46 | 42                         | fiG 2202568.10.peG.44 | 64                         |
| fiG 2202568.10.peG.61 | 26                         | fiG 2202568.10.peG.43 | 58                         |
| fiG 2202568.10.peG.44 | 22                         | fiG 2202568.10.peG.58 | 57                         |
| fiG 2202568.10.peG.79 | 3                          | fiG 2202568.10.peG.20 | 44                         |
| fiG 2202568.10.peG.42 | 1                          | fiG 2202568.10.peG.32 | 39                         |
| fiG 2202568.10.peG.9  | 0                          | fiG 2202568.10.peG.55 | 32                         |
| fiG 2202568.10.peG.84 | 0                          | fiG 2202568.10.peG.42 | 27                         |
| fiG 2202568.10.peG.83 | 0                          | fiG 2202568.10.peG.11 | 20                         |
| fiG 2202568.10.peG.82 | 0                          | fiG 2202568.10.peG.68 | 19                         |
| fiG 2202568.10.peG.81 | 0                          | fiG 2202568.10.peG.69 | 17                         |
| fiG 2202568.10.peG.80 | 0                          | fiG 2202568.10.peG.61 | 15                         |
| fiG 2202568.10.peG.8  | 0                          | fiG 2202568.10.peG.54 | 11                         |
| fiG 2202568.10.peG.78 | 0                          | fiG 2202568.10.peG.66 | 10                         |
| fiG 2202568.10.peG.77 | 0                          | fiG 2202568.10.peG.2  | 9                          |
| fiG 2202568.10.peG.76 | 0                          | fiG 2202568.10.peG.3  | 9                          |
| fiG 2202568.10.peG.75 | 0                          | fiG 2202568.10.peG.12 | 9                          |
| fiG 2202568.10.peG.74 | 0                          | fiG 2202568.10.peG.27 | 8                          |
| fiG 2202568.10.peG.73 | 0                          | fiG 2202568.10.peG.18 | 7                          |
| fiG 2202568.10.peG.72 | 0                          | fiG 2202568.10.peG.45 | 7                          |
| fiG 2202568.10.peG.7  | 0                          | fiG 2202568.10.peG.57 | 7                          |
| fiG 2202568.10.peG.69 | 0                          | fiG 2202568.10.peG.4  | 6                          |
| fiG 2202568.10.peG.68 | 0                          | fiG 2202568.10.peG.6  | 6                          |
| fiG 2202568.10.peG.67 | 0                          | fiG 2202568.10.peG.8  | 6                          |
| fiG 2202568.10.peG.66 | 0                          | fiG 2202568.10.peG.15 | 6                          |
| fiG 2202568.10.peG.65 | 0                          | fiG 2202568.10.peG.16 | 6                          |
| fiG 2202568.10.peG.64 | 0                          | fiG 2202568.10.peG.17 | 6                          |
| fiG 2202568.10.peG.63 | 0                          | fiG 2202568.10.peG.22 | 6                          |
| fiG 2202568.10.peG.62 | 0                          | fiG 2202568.10.peG.24 | 6                          |
| fiG 2202568.10.peG.60 | 0                          | fiG 2202568.10.peG.29 | 6                          |
| fiG 2202568.10.peG.6  | 0                          | fiG 2202568.10.peG.52 | 6                          |
| fiG 2202568.10.peG.59 | 0                          | fiG 2202568.10.peG.56 | 6                          |
| fiG 2202568.10.peG.58 | 0                          | fiG 2202568.10.peG.59 | 6                          |
| fiG 2202568.10.peG.57 | 0                          | fiG 2202568.10.peG.63 | 6                          |
| fiG 2202568.10.peG.56 | 0                          | fiG 2202568.10.peG.65 | 6                          |
| fiG 2202568.10.peG.55 | 0                          | fiG 2202568.10.peG.72 | 6                          |
| fiG 2202568.10.peG.54 | 0                          | fiG 2202568.10.peG.77 | 6                          |
| fiG 2202568.10.peG.53 | 0                          | fiG 2202568.10.peG.78 | 6                          |
| fiG 2202568.10.peG.52 | 0                          | fiG 2202568.10.peG.5  | 5                          |
| fiG 2202568.10.peG.51 | 0                          | fiG 2202568.10.peG.10 | 5                          |
| fiG 2202568.10.peG.50 | 0                          | fiG 2202568.10.peG.13 | 5                          |
| fiG 2202568.10.peG.5  | 0                          | fiG 2202568.10.peG.19 | 5                          |



Supplementary Table S5. Phage Depolymerase Finder (PhageDPO) results

| ID                    | ANN7185 DPO Prediction (%) | ID                    | SVM4311 DPO Prediction (%) |
|-----------------------|----------------------------|-----------------------|----------------------------|
| fiG 2202568.10.peG.49 | 0                          | fiG 2202568.10.peG.25 | 5                          |
| fiG 2202568.10.peG.48 | 0                          | fiG 2202568.10.peG.37 | 5                          |
| fiG 2202568.10.peG.47 | 0                          | fiG 2202568.10.peG.53 | 5                          |
| fiG 2202568.10.peG.45 | 0                          | fiG 2202568.10.peG.62 | 5                          |
| fiG 2202568.10.peG.43 | 0                          | fiG 2202568.10.peG.67 | 5                          |
| fiG 2202568.10.peG.41 | 0                          | fiG 2202568.10.peG.73 | 5                          |
| fiG 2202568.10.peG.40 | 0                          | fiG 2202568.10.peG.74 | 5                          |
| fiG 2202568.10.peG.4  | 0                          | fiG 2202568.10.peG.82 | 5                          |
| fiG 2202568.10.peG.39 | 0                          | fiG 2202568.10.peG.83 | 5                          |
| fiG 2202568.10.peG.38 | 0                          | fiG 2202568.10.peG.9  | 4                          |
| fiG 2202568.10.peG.37 | 0                          | fiG 2202568.10.peG.30 | 4                          |
| fiG 2202568.10.peG.36 | 0                          | fiG 2202568.10.peG.33 | 4                          |
| fiG 2202568.10.peG.35 | 0                          | fiG 2202568.10.peG.34 | 4                          |
| fiG 2202568.10.peG.34 | 0                          | fiG 2202568.10.peG.35 | 4                          |
| fiG 2202568.10.peG.33 | 0                          | fiG 2202568.10.peG.36 | 4                          |
| fiG 2202568.10.peG.31 | 0                          | fiG 2202568.10.peG.49 | 4                          |
| fiG 2202568.10.peG.30 | 0                          | fiG 2202568.10.peG.75 | 4                          |
| fiG 2202568.10.peG.3  | 0                          | fiG 2202568.10.peG.76 | 4                          |
| fiG 2202568.10.peG.29 | 0                          | fiG 2202568.10.peG.1  | 3                          |
| fiG 2202568.10.peG.28 | 0                          | fiG 2202568.10.peG.7  | 3                          |
| fiG 2202568.10.peG.27 | 0                          | fiG 2202568.10.peG.23 | 3                          |
| fiG 2202568.10.peG.26 | 0                          | fiG 2202568.10.peG.26 | 3                          |
| fiG 2202568.10.peG.25 | 0                          | fiG 2202568.10.peG.31 | 3                          |
| fiG 2202568.10.peG.24 | 0                          | fiG 2202568.10.peG.39 | 3                          |
| fiG 2202568.10.peG.23 | 0                          | fiG 2202568.10.peG.41 | 3                          |
| fiG 2202568.10.peG.22 | 0                          | fiG 2202568.10.peG.14 | 2                          |
| fiG 2202568.10.peG.21 | 0                          | fiG 2202568.10.peG.21 | 2                          |
| fiG 2202568.10.peG.20 | 0                          | fiG 2202568.10.peG.28 | 2                          |
| fiG 2202568.10.peG.2  | 0                          | fiG 2202568.10.peG.38 | 2                          |
| fiG 2202568.10.peG.19 | 0                          | fiG 2202568.10.peG.40 | 2                          |
| fiG 2202568.10.peG.18 | 0                          | fiG 2202568.10.peG.47 | 2                          |
| fiG 2202568.10.peG.17 | 0                          | fiG 2202568.10.peG.48 | 2                          |
| fiG 2202568.10.peG.16 | 0                          | fiG 2202568.10.peG.50 | 2                          |
| fiG 2202568.10.peG.15 | 0                          | fiG 2202568.10.peG.51 | 2                          |
| fiG 2202568.10.peG.14 | 0                          | fiG 2202568.10.peG.60 | 1                          |
| fiG 2202568.10.peG.13 | 0                          | fiG 2202568.10.peG.64 | 1                          |
| fiG 2202568.10.peG.12 | 0                          | fiG 2202568.10.peG.80 | 1                          |
| fiG 2202568.10.peG.11 | 0                          | fiG 2202568.10.peG.81 | 1                          |
| fiG 2202568.10.peG.10 | 0                          | fiG 2202568.10.peG.84 | 1                          |
| fiG 2202568.10.peG.1  | 0                          | fiG 2202568.10.peG.79 | 0                          |

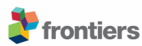

Supplementary Table S6. BLASTn results of vB\_Kpn\_ZCKp20p whole genome

| Description                                                              | Max Score | Total Score | Query Cover | E value | Per. ident | Acc. Len | Accession   | Publication citation                                                                                                                                                                                                                                                                                                                                                                   |
|--------------------------------------------------------------------------|-----------|-------------|-------------|---------|------------|----------|-------------|----------------------------------------------------------------------------------------------------------------------------------------------------------------------------------------------------------------------------------------------------------------------------------------------------------------------------------------------------------------------------------------|
| <i>Klebsiella</i> phage ZCKP8                                            | 40293     | 76010       | 88%         | 0       | 98.26      | 48490    | MZ440881.1  | Fayez MS, Hakim TA, Agwa MM, Abdelmoteleb M, Aly RG, Montaser NN, Abdelsattar AS, Rezk N, El-Shibiny A. Topically Applied Bacteriophage to Control Multi-Drug Resistant <i>Klebsiella pneumoniae</i> Infected Wound in a Rat Model. <i>Antibiotics</i> (Basel). 2021 Aug 27;10(9):1048. doi: 10.3390/antibiotics10091048. PMID: 34572629; PMCID: PMC8470685.                           |
| <i>Klebsiella</i> phage 6991, complete genome                            | 22472     | 57102       | 72%         | 0       | 96.83      | 46373    | OL362277.1  | Unpublished                                                                                                                                                                                                                                                                                                                                                                            |
| Flyfo siphovirus Tbat1_6, complete genome                                | 7463      | 41581       | 60%         | 0       | 92.32      | 48082    | OL617041.1  | Unpublished                                                                                                                                                                                                                                                                                                                                                                            |
| <i>Vibrio</i> phage pYD38-A genomic sequence                             | 7367      | 48378       | 71%         | 0       | 92.23      | 47552    | JF974312.1  | Unpublished                                                                                                                                                                                                                                                                                                                                                                            |
| <i>Aeromonas</i> phage pIS4-A genomic sequence                           | 7367      | 48042       | 71%         | 0       | 92.2       | 47624    | NC_042037.1 | Unpublished                                                                                                                                                                                                                                                                                                                                                                            |
| <i>Klebsiella</i> phage BUCT610, complete genome                         | 7203      | 44459       | 66%         | 0       | 89.8       | 46774    | MZ318367.1  | Pu M, Han P, Zhang G, Liu Y, Li Y, Li F, Li M, An X, Song L, Chen Y, Fan H, Tong Y. Characterization and Comparative Genomics Analysis of a New Bacteriophage BUCT610 against <i>Klebsiella pneumoniae</i> and Efficacy Assessment in <i>Galleria mellonella</i> Larvae. <i>Int J Mol Sci</i> . 2022 Jul 21;23(14):8040. doi: 10.3390/ijms23148040. PMID: 35887393; PMCID: PMC9321532. |
| <i>Klebsiella</i> phage YX3973, complete genome                          | 7066      | 27304       | 46%         | 0       | 85.75      | 46907    | NC_054652.1 | Unpublished                                                                                                                                                                                                                                                                                                                                                                            |
| <i>Klebsiella</i> phage ZX4, complete genome                             | 7027      | 38187       | 62%         | 0       | 85.65      | 45424    | NC_054654.1 | Unpublished                                                                                                                                                                                                                                                                                                                                                                            |
| <i>Klebsiella</i> phage BUCT541                                          | 7022      | 34498       | 59%         | 0       | 85.62      | 46100    | MZ836210.1  | Unpublished                                                                                                                                                                                                                                                                                                                                                                            |
| <i>Klebsiella</i> phage vB_KpnS_MK54                                     | 6687      | 43281       | 61%         | 0       | 92.86      | 46218    | MW119258.1  | Lu B, Yao X, Han G, Luo Z, Zhang J, Yong K, Wang Y, Luo Y, Yang Z, Ren M, Cao S. Isolation of <i>Klebsiella pneumoniae</i> Phage vB_KpnS_MK54 and Pathological Assessment of Endolysin in the Treatment of Pneumonia Mice Model. <i>Front Microbiol</i> . 2022 Mar 21;13:854908. doi: 10.3389/fmicb.2022.854908. PMID: 35387089; PMCID: PMC8978833.                                    |
| <i>Klebsiella</i> virus KpV2811, complete genome                         | 6063      | 39695       | 63%         | 0       | 86.67      | 46391    | NC_054653.1 | Unpublished                                                                                                                                                                                                                                                                                                                                                                            |
| <i>Escherichia</i> phage C1, complete genome                             | 1786      | 4996        | 19%         | 0       | 76.21      | 46667    | NC_054651.1 |                                                                                                                                                                                                                                                                                                                                                                                        |
| <i>Escherichia</i> phage S192, partial genome                            | 1786      | 4996        | 18%         | 0       | 76.2       | 46667    | ON239132.1  |                                                                                                                                                                                                                                                                                                                                                                                        |
| <i>Shigella</i> phage Sf11 SMD-2017, complete genome                     | 1718      | 2360        | 9%          | 0       | 75.97      | 46454    | NC_054636.1 |                                                                                                                                                                                                                                                                                                                                                                                        |
| TPA: <i>Siphoviridae</i> sp. isolate ctYo41                              | 1646      | 1778        | 6%          | 0       | 76.7       | 43934    | BK021922.1  |                                                                                                                                                                                                                                                                                                                                                                                        |
| TPA: <i>Siphoviridae</i> sp. isolate etbcf4                              | 1613      | 5673        | 18%         | 0       | 76.58      | 48602    | BK051619.1  |                                                                                                                                                                                                                                                                                                                                                                                        |
| TPA: <i>Siphoviridae</i> sp. isolate c6rD49                              | 1605      | 4672        | 14%         | 0       | 76.36      | 47586    | BK048029.1  |                                                                                                                                                                                                                                                                                                                                                                                        |
| TPA: <i>Siphoviridae</i> sp. isolate ctc113                              | 1482      | 2349        | 9%          | 0       | 76.52      | 45865    | BK048082.1  |                                                                                                                                                                                                                                                                                                                                                                                        |
| <i>Salmonella</i> phage Akira, complete genome                           | 1450      | 3068        | 10%         | 0       | 76.11      | 45367    | NC_054647.1 |                                                                                                                                                                                                                                                                                                                                                                                        |
| <i>Salmonella</i> phage LPST10, complete genome                          | 1439      | 2873        | 9%          | 0       | 79.69      | 47657    | NC_054645.1 |                                                                                                                                                                                                                                                                                                                                                                                        |
| Mutant <i>Salmonella</i> phage seszw clone seszw_6t3, complete genome    | 1419      | 3318        | 11%         | 0       | 76.06      | 41854    | OL964744.1  |                                                                                                                                                                                                                                                                                                                                                                                        |
| Mutant <i>Salmonella</i> phage seszw clone seszw_6t2, complete genome    | 1419      | 3318        | 11%         | 0       | 76.06      | 42512    | OL964743.1  |                                                                                                                                                                                                                                                                                                                                                                                        |
| Mutant <i>Salmonella</i> phage seszw clone seszw_6t1, complete genome    | 1419      | 3318        | 11%         | 0       | 76.06      | 41794    | OL964742.1  |                                                                                                                                                                                                                                                                                                                                                                                        |
| Mutant <i>Salmonella</i> phage seszw clone seszw_2t2, complete genome    | 1419      | 3318        | 11%         | 0       | 76.06      | 43428    | OL964752.1  |                                                                                                                                                                                                                                                                                                                                                                                        |
| Mutant <i>Salmonella</i> phage seszw clone seszw_2t1, complete genome    | 1419      | 3318        | 11%         | 0       | 76.06      | 43528    | OL964751.1  |                                                                                                                                                                                                                                                                                                                                                                                        |
| Mutant <i>Salmonella</i> phage seszw clone seszw_2t3, complete genome    | 1419      | 3318        | 11%         | 0       | 76.06      | 43626    | OL964734.1  |                                                                                                                                                                                                                                                                                                                                                                                        |
| Mutant <i>Salmonella</i> phage seszw clone seszw_270L, complete genome   | 1419      | 3312        | 11%         | 0       | 76.06      | 37892    | MZ375347.1  |                                                                                                                                                                                                                                                                                                                                                                                        |
| <i>Salmonella</i> phage seszw clone seszw_wt, complete genome            | 1419      | 3324        | 11%         | 0       | 76.06      | 45807    | MZ375232.1  |                                                                                                                                                                                                                                                                                                                                                                                        |
| Mutant <i>Salmonella</i> phage seszw clone seszw_300L.2, complete genome | 1419      | 3318        | 11%         | 0       | 76.06      | 36655    | MZ375355.1  |                                                                                                                                                                                                                                                                                                                                                                                        |
| Mutant <i>Salmonella</i> phage seszw clone seszw_300S, complete genome   | 1419      | 3318        | 11%         | 0       | 76.06      | 36991    | MZ375354.1  |                                                                                                                                                                                                                                                                                                                                                                                        |
| Mutant <i>Salmonella</i> phage seszw clone seszw_300L, complete genome   | 1419      | 3318        | 11%         | 0       | 76.06      | 37788    | MZ375353.1  |                                                                                                                                                                                                                                                                                                                                                                                        |
| Mutant <i>Salmonella</i> phage seszw clone seszw_290L, complete genome   | 1419      | 3312        | 11%         | 0       | 76.06      | 36536    | MZ375351.1  |                                                                                                                                                                                                                                                                                                                                                                                        |
| Mutant <i>Salmonella</i> phage seszw clone seszw_280L, complete genome   | 1419      | 3312        | 11%         | 0       | 76.06      | 36975    | MZ375349.1  |                                                                                                                                                                                                                                                                                                                                                                                        |
| Mutant <i>Salmonella</i> phage seszw clone seszw_270S, complete genome   | 1419      | 3318        | 11%         | 0       | 76.06      | 37845    | MZ375348.1  |                                                                                                                                                                                                                                                                                                                                                                                        |
| Mutant <i>Salmonella</i> phage seszw clone seszw_260S, complete genome   | 1419      | 3318        | 11%         | 0       | 76.06      | 37571    | MZ375346.1  |                                                                                                                                                                                                                                                                                                                                                                                        |
| Mutant <i>Salmonella</i> phage seszw clone seszw_260L, complete genome   | 1419      | 3318        | 11%         | 0       | 76.06      | 37385    | MZ375345.1  |                                                                                                                                                                                                                                                                                                                                                                                        |
| Mutant <i>Salmonella</i> phage seszw clone seszw_250S, complete genome   | 1419      | 3318        | 11%         | 0       | 76.06      | 38365    | MZ375344.1  |                                                                                                                                                                                                                                                                                                                                                                                        |
| Mutant <i>Salmonella</i> phage seszw clone seszw_250L, complete genome   | 1419      | 3307        | 11%         | 0       | 76.06      | 38024    | MZ375343.1  |                                                                                                                                                                                                                                                                                                                                                                                        |
| Mutant <i>Salmonella</i> phage seszw clone seszw_240S, complete genome   | 1419      | 3312        | 11%         | 0       | 76.06      | 37980    | MZ375342.1  |                                                                                                                                                                                                                                                                                                                                                                                        |
| Mutant <i>Salmonella</i> phage seszw clone seszw_240L, complete genome   | 1419      | 3324        | 11%         | 0       | 76.06      | 37969    | MZ375341.1  |                                                                                                                                                                                                                                                                                                                                                                                        |
| Mutant <i>Salmonella</i> phage seszw clone seszw_220S, complete genome   | 1419      | 3318        | 11%         | 0       | 76.06      | 37730    | MZ375338.1  |                                                                                                                                                                                                                                                                                                                                                                                        |
| Mutant <i>Salmonella</i> phage seszw clone seszw_220L, complete genome   | 1419      | 3318        | 11%         | 0       | 76.06      | 38358    | MZ375337.1  |                                                                                                                                                                                                                                                                                                                                                                                        |
| Mutant <i>Salmonella</i> phage seszw clone seszw_210L, complete genome   | 1419      | 3069        | 10%         | 0       | 76.06      | 38033    | MZ375335.1  |                                                                                                                                                                                                                                                                                                                                                                                        |
| Mutant <i>Salmonella</i> phage seszw clone seszw_200S, complete genome   | 1419      | 3312        | 11%         | 0       | 76.06      | 39171    | MZ375334.1  |                                                                                                                                                                                                                                                                                                                                                                                        |
| Mutant <i>Salmonella</i> phage seszw clone seszw_190S, complete genome   | 1419      | 3307        | 11%         | 0       | 76.06      | 39898    | MZ375332.1  |                                                                                                                                                                                                                                                                                                                                                                                        |
| Mutant <i>Salmonella</i> phage seszw clone seszw_190L, complete genome   | 1419      | 3318        | 11%         | 0       | 76.06      | 40874    | MZ375331.1  |                                                                                                                                                                                                                                                                                                                                                                                        |
| Mutant <i>Salmonella</i> phage seszw clone seszw_180S, complete genome   | 1419      | 3205        | 11%         | 0       | 76.06      | 37889    | MZ375330.1  |                                                                                                                                                                                                                                                                                                                                                                                        |
| Mutant <i>Salmonella</i> phage seszw clone seszw_180L, complete genome   | 1419      | 3318        | 11%         | 0       | 76.06      | 38968    | MZ375329.1  |                                                                                                                                                                                                                                                                                                                                                                                        |
| Mutant <i>Salmonella</i> phage seszw clone seszw_170L, complete genome   | 1419      | 3318        | 11%         | 0       | 76.06      | 39511    | MZ375327.1  |                                                                                                                                                                                                                                                                                                                                                                                        |
| Mutant <i>Salmonella</i> phage seszw clone seszw_160S, complete genome   | 1419      | 3318        | 11%         | 0       | 76.06      | 38984    | MZ375326.1  |                                                                                                                                                                                                                                                                                                                                                                                        |
| Mutant <i>Salmonella</i> phage seszw clone seszw_160L, complete genome   | 1419      | 3318        | 11%         | 0       | 76.06      | 37727    | MZ375325.1  |                                                                                                                                                                                                                                                                                                                                                                                        |
| Mutant <i>Salmonella</i> phage seszw clone seszw_150S, complete genome   | 1419      | 3318        | 11%         | 0       | 76.06      | 40462    | MZ375324.1  |                                                                                                                                                                                                                                                                                                                                                                                        |

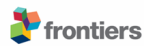

Supplementary Table S6. BLASTn results of vB\_Kpn\_ZCKp20p whole genome

| Description                                                               | Max Score | Total Score | Query Cover | E value | Per. ident | Acc. Len | Accession  | Publication citation |
|---------------------------------------------------------------------------|-----------|-------------|-------------|---------|------------|----------|------------|----------------------|
| Mutant <i>Salmonella</i> phage seszw clone seszw_150L, complete genome    | 1419      | 3318        | 11%         | 0       | 76.06      | 40035    | MZ375323.1 |                      |
| Mutant <i>Salmonella</i> phage seszw clone seszw_140S, complete genome    | 1419      | 3312        | 11%         | 0       | 76.06      | 39996    | MZ375322.1 |                      |
| Mutant <i>Salmonella</i> phage seszw clone seszw_130S, complete genome    | 1419      | 3324        | 11%         | 0       | 76.06      | 45900    | MZ375320.1 |                      |
| Mutant <i>Salmonella</i> phage seszw clone seszw_120S, complete genome    | 1419      | 3318        | 11%         | 0       | 76.06      | 40916    | MZ375318.1 |                      |
| Mutant <i>Salmonella</i> phage seszw clone seszw_120L, complete genome    | 1419      | 3318        | 11%         | 0       | 76.06      | 40621    | MZ375317.1 |                      |
| Mutant <i>Salmonella</i> phage seszw clone seszw_110S, complete genome    | 1419      | 3318        | 11%         | 0       | 76.06      | 40876    | MZ375316.1 |                      |
| Mutant <i>Salmonella</i> phage seszw clone seszw_110L, complete genome    | 1419      | 3318        | 11%         | 0       | 76.06      | 40680    | MZ375315.1 |                      |
| Mutant <i>Salmonella</i> phage seszw clone seszw_100S, complete genome    | 1419      | 3318        | 11%         | 0       | 76.06      | 42961    | MZ375314.1 |                      |
| Mutant <i>Salmonella</i> phage seszw clone seszw_100L, complete genome    | 1419      | 3324        | 11%         | 0       | 76.06      | 45853    | MZ375313.1 |                      |
| Mutant <i>Salmonella</i> phage seszw clone seszw_90S, complete genome     | 1419      | 3307        | 11%         | 0       | 76.06      | 41868    | MZ375312.1 |                      |
| Mutant <i>Salmonella</i> phage seszw clone seszw_90L, complete genome     | 1419      | 3318        | 11%         | 0       | 76.06      | 41749    | MZ375311.1 |                      |
| Mutant <i>Salmonella</i> phage seszw clone seszw_80S, complete genome     | 1419      | 3318        | 11%         | 0       | 76.06      | 42007    | MZ375310.1 |                      |
| Mutant <i>Salmonella</i> phage seszw clone seszw_80L, complete genome     | 1419      | 3318        | 11%         | 0       | 76.06      | 42032    | MZ375309.1 |                      |
| Mutant <i>Salmonella</i> phage seszw clone seszw_70S, complete genome     | 1419      | 3318        | 11%         | 0       | 76.06      | 42032    | MZ375308.1 |                      |
| Mutant <i>Salmonella</i> phage seszw clone seszw_70L, complete genome     | 1419      | 3213        | 11%         | 0       | 76.06      | 42912    | MZ375307.1 |                      |
| Mutant <i>Salmonella</i> phage seszw clone seszw_60S, complete genome     | 1419      | 3318        | 11%         | 0       | 76.06      | 43917    | MZ375306.1 |                      |
| Mutant <i>Salmonella</i> phage seszw clone seszw_60L, complete genome     | 1419      | 3205        | 11%         | 0       | 76.06      | 43337    | MZ375305.1 |                      |
| Mutant <i>Salmonella</i> phage seszw clone seszw_50S, complete genome     | 1419      | 3324        | 11%         | 0       | 76.06      | 44906    | MZ375304.1 |                      |
| Mutant <i>Salmonella</i> phage seszw clone seszw_50L, complete genome     | 1419      | 3324        | 11%         | 0       | 76.06      | 44462    | MZ375303.1 |                      |
| Mutant <i>Salmonella</i> phage seszw clone seszw_40S, complete genome     | 1419      | 3220        | 11%         | 0       | 76.06      | 45155    | MZ375302.1 |                      |
| Mutant <i>Salmonella</i> phage seszw clone seszw_40L, complete genome     | 1419      | 3324        | 11%         | 0       | 76.06      | 43557    | MZ375301.1 |                      |
| Mutant <i>Salmonella</i> phage seszw clone seszw_30L, complete genome     | 1419      | 3324        | 11%         | 0       | 76.06      | 44704    | MZ375299.1 |                      |
| Mutant <i>Salmonella</i> phage seszw clone seszw_20L, complete genome     | 1419      | 3324        | 11%         | 0       | 76.06      | 45558    | MZ375297.1 |                      |
| Mutant <i>Salmonella</i> phage seszw clone seszw_230L, complete genome    | 1413      | 3312        | 11%         | 0       | 76.03      | 38108    | MZ375339.1 |                      |
| TPA: <i>Siphoviridae</i> sp. isolate ctTyE9                               | 1411      | 3576        | 10%         | 0       | 79.12      | 45433    | BK033144.1 |                      |
| <i>Klebsiella pneumoniae</i> strain E16KP0268 chromosome, complete genome | 1402      | 2551        | 5%          | 0       | 96.15      | 5280881  | CP052268.1 |                      |
| Mutant <i>Salmonella</i> phage seszw clone seszw_200L, complete genome    | 1391      | 3178        | 9%          | 0       | 78.81      | 38195    | MZ375333.1 |                      |
| Mutant <i>Salmonella</i> phage seszw clone seszw_20S, complete genome     | 1391      | 3296        | 10%         | 0       | 78.81      | 45533    | MZ375298.1 |                      |

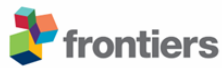

**Supplementary Table S7. ANIb results of vB\_Kpn\_ZCKp20p genome on JSpeciesWS**

| Genome                        | ANIb [%] | Aligned [%] | Aligned [bp] | Total [bp] |
|-------------------------------|----------|-------------|--------------|------------|
| Klebsiella_phage_ZCKP8        | 96.73    | 86.77       | 42343        | 48797      |
| Klebsiella_phage_6991         | 95.49    | 71.82       | 35044        | 48797      |
| Klebsiella_phage_BUCT61       | 90.29    | 52.7        | 25714        | 48797      |
| Klebsiella_phage_vB_KpnS_MK54 | 89.94    | 50.77       | 24776        | 48797      |
| Flyfo_siphovirus_Tbat1_6      | 89.71    | 53.25       | 25984        | 48797      |
| Aeromonas_phage_pIS4-A        | 88.37    | 60.1        | 29327        | 48797      |
| Vibrio_phage_pYD38-A          | 88.35    | 60.13       | 29340        | 48797      |
| Klebsiella_virus_KpV2811      | 87.5     | 55.91       | 27284        | 48797      |
| Klebsiella_phage_ZX4          | 86.29    | 56.94       | 27785        | 48797      |
| Klebsiella_phage_BUCT541      | 85.24    | 53.23       | 25976        | 48797      |
| Klebsiella_phage_YX3973       | 84.67    | 48.2        | 23518        | 48797      |



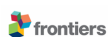

Supplementary Table S8. PATRIC proteomic comparison results

| vB_Kpn_ZCKp20p (Reference Genome)     |       |       | ZCKP8 (Genome 1) |           |                                   |          | Phage_6991 (Genome 2) |          |           |                                   |          |          |
|---------------------------------------|-------|-------|------------------|-----------|-----------------------------------|----------|-----------------------|----------|-----------|-----------------------------------|----------|----------|
| ref_genome_patric_id                  | Start | End   | Hit              | aa length | patric_id / locus tag             | Identity | Coverage              | Hit      | aa length | patric_id / locus tag             | Identity | Coverage |
| <a href="#">fig 2202568.10.peg.72</a> | 40612 | 40806 |                  |           |                                   |          |                       |          |           |                                   |          |          |
| <a href="#">fig 2202568.10.peg.73</a> | 40867 | 41370 | bi (<->)         | 167       | lcl MZ440881.1_prot_QYW02950.1_74 | 1        | 0.994                 |          |           |                                   |          |          |
| <a href="#">fig 2202568.10.peg.74</a> | 41431 | 42468 | bi (<->)         | 345       | lcl MZ440881.1_prot_QYW02951.1_75 | 1        | 0.997                 |          |           |                                   |          |          |
| <a href="#">fig 2202568.10.peg.75</a> | 42529 | 42804 |                  |           |                                   |          |                       |          |           |                                   |          |          |
| <a href="#">fig 2202568.10.peg.76</a> | 42865 | 43821 | bi (<->)         | 318       | lcl MZ440881.1_prot_QYW02952.1_76 | 1        | 0.997                 |          |           |                                   |          |          |
| <a href="#">fig 2202568.10.peg.77</a> | 43882 | 44325 | bi (<->)         | 147       | lcl MZ440881.1_prot_QYW02953.1_77 | 1        | 0.993                 |          |           |                                   |          |          |
| <a href="#">fig 2202568.10.peg.78</a> | 44386 | 44802 | bi (<->)         | 138       | lcl MZ440881.1_prot_QYW02954.1_78 | 0.986    | 0.993                 | bi (<->) | 152       | lcl OL362277.1_prot_URY99595.1_61 | 0.316    | 0.73     |
| <a href="#">fig 2202568.10.peg.79</a> | 44863 | 46770 | bi (<->)         | 635       | lcl MZ440881.1_prot_QYW02955.1_79 | 1        | 0.998                 | bi (<->) | 620       | lcl OL362277.1_prot_URY99596.1_62 | 0.264    | 0.811    |
| <a href="#">fig 2202568.10.peg.80</a> | 46831 | 47604 | bi (<->)         | 257       | lcl MZ440881.1_prot_QYW02956.1_80 | 0.996    | 0.996                 |          |           |                                   |          |          |
| <a href="#">fig 2202568.10.peg.81</a> | 47665 | 48558 | bi (<->)         | 317       | lcl MZ440881.1_prot_QYW02927.1_81 | 1        | 0.934                 |          |           |                                   |          |          |
| <a href="#">fig 2202568.10.peg.82</a> | 48619 | 48852 | bi (<->)         | 77        | lcl MZ440881.1_prot_QYW02957.1_82 | 0.987    | 0.987                 |          |           |                                   |          |          |
| <a href="#">fig 2202568.10.peg.83</a> | 48913 | 50466 | bi (<->)         | 518       | lcl MZ440881.1_prot_QYW02958.1_83 | 1        | 0.996                 |          |           |                                   |          |          |
| <a href="#">fig 2202568.10.peg.84</a> | 50527 | 50760 | bi (<->)         | 78        | lcl MZ440881.1_prot_QYW02959.1_84 | 1        | 0.974                 |          |           |                                   |          |          |

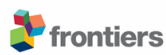

**Supplementary Table S9. List of phages have the highest normalized tBLASTx scores ( $S_c$ ) to vB\_Kpn\_ZCKp20p, calculated by ViPTree**

| NCBI Accession #  | Phage Name                                          | Genome length | Virus family / Morphotype | Host group          | $S_c$ to OP373729.1 |
|-------------------|-----------------------------------------------------|---------------|---------------------------|---------------------|---------------------|
| <b>OP373729.1</b> | <b>user_virus1: Klebsiella phage vB_Kpn_ZCKp20p</b> | 48797         | Siphovirus                | Gammaproteobacteria | 1                   |
| <b>MZ440881.1</b> | <b>user_virus2: Klebsiella phage ZCKP8</b>          | 48490         | Siphovirus                | Gammaproteobacteria | 0.9198              |
| <b>OL362277.1</b> | <b>user_virus3: Klebsiella phage 6991</b>           | 46373         | Siphovirus                | Gammaproteobacteria | 0.7499              |
| NC_021534         | Vibrio phage pYD38-A                                | 47552         | -                         | Gammaproteobacteria | 0.6756              |
| NC_042037         | Aeromonas phage pIS4-A                              | 47624         | -                         | Gammaproteobacteria | 0.6735              |
| NC_054653         | Klebsiella virus KpV2811                            | 46391         | Siphoviridae              | Gammaproteobacteria | 0.5959              |
| NC_054654         | Klebsiella phage vB_KpnS_ZX4                        | 45424         | Siphoviridae              | Gammaproteobacteria | 0.5953              |
| NC_054652         | Klebsiella phage YX3973                             | 46907         | Siphoviridae              | Gammaproteobacteria | 0.4602              |
| NC_054650         | Shigella phage DS8                                  | 44605         | -                         | Gammaproteobacteria | 0.4025              |
| NC_054649         | Escherichia phage vB_EcoS_swi2                      | 47611         | -                         | Gammaproteobacteria | 0.3978              |
| NC_054648         | Salmonella phage vB_Se_STGO-35-1                    | 47483         | -                         | Gammaproteobacteria | 0.3976              |
| NC_031924         | Salmonella phage IME207                             | 47564         | -                         | Gammaproteobacteria | 0.3975              |
| NC_054651         | Escherichia phage C1                                | 46667         | -                         | Gammaproteobacteria | 0.3887              |
| NC_054639         | Salmonella phage Skate                              | 47393         | -                         | Gammaproteobacteria | 0.3822              |
| NC_010495         | Salmonella phage Vi II-E1                           | 45051         | -                         | Gammaproteobacteria | 0.378               |
| NC_054644         | Salmonella virus VSt472                             | 46905         | -                         | Gammaproteobacteria | 0.3738              |
| NC_054643         | Salmonella phage SeSz-2                             | 45049         | -                         | Gammaproteobacteria | 0.3736              |
| NC_054641         | Salmonella virus KFS-SE2                            | 48608         | -                         | Gammaproteobacteria | 0.3662              |
| NC_054640         | Salmonella phage Segz_1                             | 48285         | -                         | Gammaproteobacteria | 0.3648              |
| NC_054645         | Salmonella phage LPST10                             | 47657         | -                         | Gammaproteobacteria | 0.3585              |
| NC_054646         | Salmonella phage VB_StyS_BS5                        | 47604         | -                         | Gammaproteobacteria | 0.3584              |
| NC_054647         | Salmonella phage Akira                              | 45367         | -                         | Gammaproteobacteria | 0.3555              |
| NC_054642         | Salmonella phage Seszw_1                            | 45881         | -                         | Gammaproteobacteria | 0.3367              |
| NC_031918         | Salmonella phage 64795_sal3                         | 45342         | -                         | Gammaproteobacteria | 0.3325              |
| NC_054638         | Salmonella phage vB_SenS_SB28                       | 45126         | -                         | Gammaproteobacteria | 0.3246              |
| NC_054636         | Shigella phage Sfl1 SMD-2017                        | 46454         | -                         | Gammaproteobacteria | 0.3033              |
| NC_054637         | Escherichia phage vB_EcoS_Sa179lw                   | 46833         | -                         | Gammaproteobacteria | 0.2738              |
| NC_048198         | Erwinia phage vB_EhrS_59                            | 47116         | -                         | Gammaproteobacteria | 0.1205              |
| NC_019927         | Cronobacter phage ENT47670                          | 47611         | Siphoviridae              | Gammaproteobacteria | 0.1038              |
| NC_048197         | Erwinia phage vB_EhrS_49                            | 46835         | -                         | Gammaproteobacteria | 0.0686              |
| NC_049845         | Klebsiella phage PhiKpNIH-2                         | 49477         | Drexlerviridae            | Gammaproteobacteria | 0.0602              |
| NC_049847         | Klebsiella phage Sin4                               | 49916         | Drexlerviridae            | Gammaproteobacteria | 0.0579              |
| NC_049848         | Klebsiella phage KP1801                             | 49835         | Drexlerviridae            | Gammaproteobacteria | 0.0573              |
| NC_028743         | Mannheimia phage vB_MhS_587AP2                      | 48594         | Siphoviridae              | Gammaproteobacteria | 0.0562              |
| NC_028853         | Mannheimia phage vB_MhS_535AP2                      | 50078         | Siphoviridae              | Gammaproteobacteria | 0.0562              |
| NC_028760         | Klebsiella phage KLPN1                              | 49037         | Drexlerviridae            | Gammaproteobacteria | 0.056               |
| NC_047850         | Klebsiella phage MezzoGao                           | 49807         | Drexlerviridae            | Gammaproteobacteria | 0.0559              |
| NC_047820         | Escherichia phage vB_EcoS_ESCO41                    | 50800         | Drexlerviridae            | Gammaproteobacteria | 0.0546              |
| NC_049839         | Klebsiella phage Sweeny                             | 50241         | Drexlerviridae            | Gammaproteobacteria | 0.0536              |
| NC_049834         | Klebsiella phage vB_KpnS_IMGroot                    | 52866         | Drexlerviridae            | Gammaproteobacteria | 0.0529              |
| NC_048206         | Escherichia phage vB_Eco_mar001J1                   | 50343         | Drexlerviridae            | Gammaproteobacteria | 0.0526              |
| NC_048204         | Escherichia phage vB_Eco_mar001J1                   | 50343         | Drexlerviridae            | Gammaproteobacteria | 0.0526              |
| NC_049835         | Klebsiella phage vB_KpnS_Domnhall                   | 54438         | Drexlerviridae            | Gammaproteobacteria | 0.0521              |
| NC_042066         | Tlsvirus SP126                                      | 51092         | Drexlerviridae            | Gammaproteobacteria | 0.052               |
| NC_048143         | Klebsiella phage KpKT21phi1                         | 49106         | Drexlerviridae            | Gammaproteobacteria | 0.0518              |
| NC_043469         | Enterobacter phage F20                              | 51543         | Drexlerviridae            | Gammaproteobacteria | 0.0517              |
| NC_031053         | Klebsiella phage PKP126                             | 50934         | Drexlerviridae            | Gammaproteobacteria | 0.0517              |
| NC_006949         | Enterobacteria phage ES18                           | 46900         | Siphoviridae              | Gammaproteobacteria | 0.0516              |
| NC_047907         | Klebsiella phage GML-KpCol1                         | 50249         | Drexlerviridae            | Gammaproteobacteria | 0.0514              |
| NC_049833         | Klebsiella phage vB_KpnS_SegesCirculi               | 50713         | Drexlerviridae            | Gammaproteobacteria | 0.0513              |
| NC_041873         | Escherichia phage JMPW2                             | 50298         | Drexlerviridae            | Gammaproteobacteria | 0.0512              |
| NC_028786         | Klebsiella phage 1513                               | 49462         | Drexlerviridae            | Gammaproteobacteria | 0.0508              |
| NC_048043         | Klebsiella phage NJS2                               | 50132         | Drexlerviridae            | Gammaproteobacteria | 0.0508              |
| NC_049841         | Klebsiella phage Skenny                             | 49935         | Drexlerviridae            | Gammaproteobacteria | 0.0508              |
| NC_049842         | Klebsiella phage vB_KpnS_15-38_KLPPOU149            | 49316         | Drexlerviridae            | Gammaproteobacteria | 0.0508              |
| NC_049836         | Klebsiella phage vB_KpnS_Call                       | 51487         | Drexlerviridae            | Gammaproteobacteria | 0.0507              |





**Supplementary Table S9. List of phages have the highest normalized tBLASTx scores ( $S_c$ ) to vB\_Kpn\_ZCKp20p, calculated by ViPTree**

| NCBI Accession # | Phage Name                       | Genome length | Virus family / Morphotype | Host group          | $S_c$ to OP373729.1 |
|------------------|----------------------------------|---------------|---------------------------|---------------------|---------------------|
| NC_028774        | Klebsiella phage Sushi           | 48754         | Drexlerviridae            | Gammaproteobacteria | 0.0507              |
| NC_047784        | Klebsiella phage vB_KpnS_KpV522  | 51099         | Drexlerviridae            | Gammaproteobacteria | 0.0506              |
| NC_049840        | Klebsiella phage vB_KpnS_FZ10    | 50381         | Drexlerviridae            | Gammaproteobacteria | 0.0506              |
| NC_047825        | Klebsiella phage KOX1            | 50526         | Drexlerviridae            | Gammaproteobacteria | 0.0505              |
| NC_049837        | Klebsiella phage vB_KpnS_Alina   | 51780         | Drexlerviridae            | Gammaproteobacteria | 0.0505              |
| NC_049814        | Shigella phage JK16              | 51854         | Drexlerviridae            | Gammaproteobacteria | 0.0504              |
| NC_048162        | Klebsiella phage GH-K3           | 49427         | Drexlerviridae            | Gammaproteobacteria | 0.05                |
| NC_047847        | Shigella phage Sd1               | 48262         | Drexlerviridae            | Gammaproteobacteria | 0.0498              |
| NC_048126        | Klebsiella phage TSK1            | 49861         | Drexlerviridae            | Gammaproteobacteria | 0.0498              |
| NC_055956        | Klebsiella phage RAD2            | 49276         | Drexlerviridae            | Gammaproteobacteria | 0.0497              |
| NC_048024        | Klebsiella phage NJS1            | 49292         | Drexlerviridae            | Gammaproteobacteria | 0.0497              |
| NC_047841        | Klebsiella phage KPN N141        | 49090         | Drexlerviridae            | Gammaproteobacteria | 0.0497              |
| NC_049853        | Escherichia phage Henu8          | 49890         | Drexlerviridae            | Gammaproteobacteria | 0.0495              |
| NC_049846        | Klebsiella phage Shelby          | 49045         | Drexlerviridae            | Gammaproteobacteria | 0.0494              |
| NC_048042        | Klebsiella phage TAH8            | 49344         | Drexlerviridae            | Gammaproteobacteria | 0.0494              |
| NC_048044        | Klebsiella phage NJR15           | 49468         | Drexlerviridae            | Gammaproteobacteria | 0.0493              |
| NC_029099        | Klebsiella phage KP36            | 49797         | Drexlerviridae            | Gammaproteobacteria | 0.0491              |
| NC_009540        | Escherichia phage Tls            | 49902         | Drexlerviridae            | Gammaproteobacteria | 0.0488              |
| NC_047996        | Escherichia phage Eco_BIFF       | 49372         | Drexlerviridae            | Gammaproteobacteria | 0.0484              |
| NC_021331        | Shigella phage pSF-1             | 51821         | Drexlerviridae            | Gammaproteobacteria | 0.0481              |
| NC_049815        | Escherichia phage tonn           | 51012         | Drexlerviridae            | Gammaproteobacteria | 0.048               |
| NC_047823        | Citrobacter phage CF1 DK-2017    | 50339         | Drexlerviridae            | Gammaproteobacteria | 0.0479              |
| NC_019509        | Cronobacter phage ESP2949-1      | 49116         | Drexlerviridae            | Gammaproteobacteria | 0.0473              |
| NC_048088        | Cronobacter phage CS01           | 48195         | Drexlerviridae            | Gammaproteobacteria | 0.0473              |
| NC_048202        | Escherichia phage vB_EcoS_swan01 | 50865         | Drexlerviridae            | Gammaproteobacteria | 0.0473              |
| NC_054893        | Escherichia phage vB_EcoS_W011D  | 49847         | Drexlerviridae            | Gammaproteobacteria | 0.0471              |
| NC_023743        | Escherichia phage phiEB49        | 47180         | Drexlerviridae            | Gammaproteobacteria | 0.0465              |
| NC_049819        | Escherichia phage atuna          | 50732         | Drexlerviridae            | Gammaproteobacteria | 0.0465              |
| NC_049817        | Escherichia phage tonnikala      | 51277         | Drexlerviridae            | Gammaproteobacteria | 0.0463              |
| NC_031050        | Escherichia phage vB_EcoS_NBD2   | 51802         | Drexlerviridae            | Gammaproteobacteria | 0.0462              |
| NC_054892        | Escherichia phage vB_EcoS_PHB17  | 48939         | Drexlerviridae            | Gammaproteobacteria | 0.046               |
| NC_047848        | Shigella phage Sf12              | 47647         | Drexlerviridae            | Gammaproteobacteria | 0.0458              |
| NC_049821        | Salmonella phage slyngel         | 51048         | Drexlerviridae            | Gammaproteobacteria | 0.0458              |
| NC_049822        | Escherichia phage vB_EcoS_G29-2  | 51739         | Drexlerviridae            | Gammaproteobacteria | 0.0458              |
| NC_049824        | Escherichia phage vojen          | 50709         | Drexlerviridae            | Gammaproteobacteria | 0.0457              |
| NC_048132        | Escherichia phage vB_EcoS-95     | 50910         | Drexlerviridae            | Gammaproteobacteria | 0.0457              |
| NC_047893        | Escherichia phage DTL            | 45814         | Drexlerviridae            | Gammaproteobacteria | 0.0456              |
| NC_047898        | Salmonella phage YSP2            | 50316         | Drexlerviridae            | Gammaproteobacteria | 0.0456              |
| NC_049852        | Escherichia phage egaa           | 51643         | Drexlerviridae            | Gammaproteobacteria | 0.0455              |
| NC_042122        | Enterobacter phage Ec_L1         | 51894         | Drexlerviridae            | Gammaproteobacteria | 0.0454              |
| NC_049816        | Escherichia phage tunus          | 51111         | Drexlerviridae            | Gammaproteobacteria | 0.0453              |
| NC_049825        | Escherichia phage grams          | 49530         | Drexlerviridae            | Gammaproteobacteria | 0.0452              |
| NC_049829        | Escherichia phage aalborg        | 46660         | Drexlerviridae            | Gammaproteobacteria | 0.0451              |
| NC_054894        | Escherichia phage Henu7          | 49526         | Drexlerviridae            | Gammaproteobacteria | 0.045               |



**Supplementary Table S10. Intergenomic similarities of RefSeq phage genomes to vB\_Kpn\_ZCKp20p, calculated by VIRIDIC**

| Genome                                             | Intergenomic Similarity% |
|----------------------------------------------------|--------------------------|
| <b>OP373729.1_Klebsiella_phage_vB_Kpn_ZCKp20p</b>  | <b>100</b>               |
| MZ440881.1_Klebsiella_phage_ZCKP8                  | 90.563                   |
| OL362277.1_Klebsiella_phage_6991                   | 72.83                    |
| NC_021534.1_Vibrio_phage_pYD38-A                   | 69.987                   |
| NC_042037.1_Aeromonas_phage_pIS4-A                 | 69.692                   |
| ON602738.1_Klebsiella_phage_VLCpiS13a              | 67.194                   |
| MZ318367.1_Klebsiella_phage_BUCT610                | 65.29                    |
| MW119258.1_Klebsiella_phage_vB_KpnS_MK54           | 63.136                   |
| ON602730.1_Klebsiella_phage_VLCpiS13f              | 62.906                   |
| NC_054654.1_Klebsiella_phage_ZX4                   | 62.349                   |
| NC_054653.1_Klebsiella_virus_KpV2811               | 61.863                   |
| ON602759.1_Klebsiella_phage_VLCpiS13e              | 61.227                   |
| OL617041.1_Flyfo_siphovirus_Tbat1_6                | 59.321                   |
| MZ836210.1_Klebsiella_phage_BUCT541                | 58.067                   |
| ON602737.1_Klebsiella_phage_VLCpiS13c              | 55.541                   |
| ON602760.1_Klebsiella_phage_VLCpiS13d              | 54.09                    |
| NC_054652.1_Klebsiella_phage_YX3973                | 47.588                   |
| NC_054650.1_Shigella_phage_DS8                     | 38.299                   |
| NC_054648.1_Salmonella_phage_vB_Se_STGO-35-1       | 37.569                   |
| NC_054651.1_Escherichia_phage_C1                   | 37.312                   |
| NC_031924.1_Salmonella_phage_IME207                | 36.963                   |
| NC_054649.1_Escherichia_phage_vB_EcoS_swi2         | 34.781                   |
| NC_010495.1_Salmonella_phage_E1                    | 33.952                   |
| NC_054639.1_Salmonella_phage_Skate                 | 33.918                   |
| NC_054643.1_Salmonella_phage_SeSz-2                | 33.712                   |
| NC_054647.1_Salmonella_phage_Akira                 | 33.612                   |
| NC_054641.1_Salmonella_virus_KFS-SE2               | 33.446                   |
| NC_054644.1_Salmonella_virus_VSt472                | 32.848                   |
| NC_054642.1_Salmonella_phage_Seszw_1               | 31.307                   |
| NC_054646.1_Salmonella_phage_VB_StyS_BS5           | 31.198                   |
| NC_054640.1_Salmonella_phage_Segz_1                | 30.694                   |
| NC_031918.1_Salmonella_phage_64795_sal3            | 30.236                   |
| NC_054645.1_Salmonella_phage_LPST10                | 30.204                   |
| NC_054638.1_Salmonella_phage_vB_SenS_SB28          | 28.372                   |
| NC_054636.1_Shigella_phage_Sf11_SMD-2017           | 27.699                   |
| NC_054637.1_Escherichia_coli_Phage_vB_EcoS-Sa179lw | 26.024                   |
| NC_048198.1_Erwinia_phage_vB_EhrS_59               | 5.142                    |
| NC_019927.1_Cronobacter_phage_ENT47670             | 3.873                    |
| NC_048197.1_Erwinia_phage_vB_EhrS_49               | 2.51                     |



**Supplementary Table S10. Intergenomic similarities of RefSeq phage genomes to vB\_Kpn\_ZCKp20p, calculated by VIRIDIC**

| Genome                                                               | Intergenomic Similarity% |
|----------------------------------------------------------------------|--------------------------|
| NC_031048.1_Enterobacter_phage_Arya                                  | 1.905                    |
| NC_025430.1_Escherichia_phage_vB_EcoM-ep3                            | 1.694                    |
| NC_048088.1_Cronobacter_phage_CS01                                   | 1.524                    |
| NC_019509.1_Cronobacter_phage_ESP2949-1                              | 1.471                    |
| NC_048067.1_Escherichia_phage_C130_2                                 | 1.466                    |
| NC_006949.1_Enterobacteria_phage_ES18                                | 1.402                    |
| NC_054897.1_Citrobacter_virus_HCF1                                   | 1.385                    |
| NC_009540.1_Enterobacteria_phage_TLS                                 | 1.295                    |
| NC_049836.1_Klebsiella_phage_vB_KpnS_Call                            | 1.219                    |
| NC_027995.1_Escherichia_phage_vB_EcoM_ECO1230-10                     | 1.197                    |
| NC_017981.1_Xanthomonas_phage_vB_XveM_DIBBI                          | 1.193                    |
| NC_047825.1_Klebsiella_phage_KOX1                                    | 1.174                    |
| NC_049835.1_Klebsiella_phage_vB_KpnS_Domnhall                        | 1.164                    |
| NC_054892.1_Escherichia_phage_vB_EcoS_PHB17                          | 1.156                    |
| NC_048766.1_Pantoea_phage_vB_PagM_AAM37                              | 1.146                    |
| NC_048767.1_Pantoea_phage_vB_PagM_PSKM                               | 1.13                     |
| NC_047784.1_Klebsiella_phage_vB_KpnS_KpV522                          | 1.117                    |
| NC_049853.1_Escherichia_phage_Henu8                                  | 1.102                    |
| NC_049833.1_Klebsiella_phage_vB_KpnS_SegesCirculi                    | 1.079                    |
| NC_049837.1_Klebsiella_phage_vB_KpnS_Alina                           | 1.076                    |
| NC_054898.1_Vibrio_virus_2019VC1                                     | 1.071                    |
| NC_048204.1_Escherichia_virus_vB_Eco_mar001J1_strain_vB_Eco_mar002J2 | 1.071                    |
| NC_048206.1_Escherichia_virus_vB_Eco_mar001J1                        | 1.071                    |
| NC_054893.1_Escherichia_phage_vB_EcoS_W011D                          | 1.071                    |
| NC_049819.1_Escherichia_phage_atuna                                  | 1.045                    |
| NC_048112.1_Escherichia_phage_Skarpretter                            | 1.041                    |
| NC_047898.1_Salmonella_phage_YSF2                                    | 1.037                    |
| NC_028743.1_Mannheimia_phage_vB_MhS_587AP2                           | 1.021                    |
| NC_028853.1_Mannheimia_phage_vB_MhS_535AP2                           | 1.005                    |
| NC_049828.1_Escherichia_phage_haarsle                                | 1.003                    |
| NC_049825.1_Escherichia_phage_grams                                  | 0.995                    |
| NC_021331.1_Shigella_phage_pSf-1                                     | 0.986                    |
| NC_049826.1_Escherichia_phage_aaroes                                 | 0.936                    |
| NC_049847.1_Klebsiella_phage_Sin4                                    | 0.933                    |
| NC_049848.1_Klebsiella_phage_KP1801                                  | 0.929                    |
| NC_049815.1_Escherichia_phage_tonn                                   | 0.922                    |
| NC_049817.1_Escherichia_phage_tonnikala                              | 0.917                    |
| NC_049824.1_Escherichia_phage_vojen                                  | 0.915                    |
| NC_048178.1_Escherichia_phage_Sortsne                                | 0.908                    |
| NC_049830.1_Escherichia_phage_PGN590                                 | 0.904                    |
| NC_049827.1_Escherichia_phage_damhaus                                | 0.888                    |



**Supplementary Table S10. Intergenomic similarities of RefSeq phage genomes to vB\_Kpn\_ZCKp20p, calculated by VIRIDIC**

| Genome                                        | Intergenomic Similarity% |
|-----------------------------------------------|--------------------------|
| NC_028760.1_Klebsiella_phage_KLPN1            | 0.885                    |
| NC_047820.1_Escherichia_phage_vB_EcoS_ESCO41  | 0.884                    |
| NC_047938.1_Escherichia_phage_SECphi27        | 0.877                    |
| NC_048132.1_Escherichia_phage_vB_EcoS-95      | 0.859                    |
| NC_041926.1_Escherichia_phage_vB_EcoM_ECOO78  | 0.846                    |
| NC_031050.1_Enterobacteria_phage_vB_EcoS_NBD2 | 0.845                    |
| NC_047985.1_Escherichia_phage_LL5             | 0.836                    |
| NC_005857.1_Klebsiella_phage_phiKO2           | 0.829                    |
| NC_047996.1_Escherichia_phage_Eco_BIFF        | 0.827                    |
| NC_048113.1_Salmonella_phage_Lumpael          | 0.823                    |
| NC_049834.1_Klebsiella_phage_vB_KpnS_IMGroot  | 0.816                    |
| NC_054894.1_Escherichia_phage_Henu7           | 0.816                    |
| NC_031026.1_Salmonella_phage_phSE-2           | 0.809                    |
| NC_047947.1_Salmonella_phage_vB_SenS_PHB07    | 0.801                    |
| NC_048202.1_Escherichia_phage_vB_Eco_swan01   | 0.8                      |
| NC_042122.1_Enterobacter_phage_Ec_L1          | 0.793                    |
| NC_048162.1_Klebsiella_phage_GH-K3            | 0.792                    |
| NC_049852.1_Escherichia_phage_egaa            | 0.787                    |
| NC_049829.1_Escherichia_phage_aalborv         | 0.784                    |
| NC_047823.1_Citrobacter_phage_CF1_DK-2017     | 0.779                    |
| NC_049816.1_Escherichia_phage_tunus           | 0.751                    |
| NC_049846.1_Klebsiella_phage_Shelby           | 0.75                     |
| NC_049814.1_Shigella_phage_JK16               | 0.749                    |
| NC_049838.1_Klebsiella_phage_KL               | 0.747                    |
| NC_054895.1_Escherichia_phage_vB_Eco_SLUR29   | 0.742                    |
| NC_054896.1_Escherichia_phage_tiwna           | 0.737                    |
| NC_049845.1_Klebsiella_phage_PhiKpNIH-2       | 0.736                    |
| NC_047850.1_Klebsiella_phage_MezzoGao         | 0.728                    |
| NC_049822.1_Escherichia_phage_vB_EcoS_G29-2   | 0.728                    |
| NC_049818.1_Escherichia_phage_tonijn          | 0.721                    |
| NC_049821.1_Salmonella_phage_slyngel          | 0.721                    |
| NC_027350.1_Citrobacter_phage_Stevie          | 0.718                    |
| NC_049820.1_Shigella_virus_2019SD1            | 0.717                    |
| NC_049823.1_Escherichia_phage_herni           | 0.716                    |
| NC_047862.1_Klebsiella_phage_vB_KpnS_IME279   | 0.71                     |
| NC_049844.1_Klebsiella_phage_13               | 0.701                    |
| NC_049840.1_Klebsiella_phage_vB_KpnS_FZ10     | 0.7                      |
| NC_047907.1_Klebsiella_virus_GML-KpCol1       | 0.697                    |
| NC_031053.1_Klebsiella_phage_PKP126           | 0.694                    |
| NC_041874.1_Escherichia_phage_JMPW1           | 0.693                    |
| NC_019719.1_Enterobacteria_phage_HK633        | 0.675                    |



**Supplementary Table S10. Intergenomic similarities of RefSeq phage genomes to vB\_Kpn\_ZCKp20p, calculated by VIRIDIC**

| Genome                                               | Intergenomic Similarity% |
|------------------------------------------------------|--------------------------|
| NC_048042.1_Klebsiella_phage_TAH8                    | 0.662                    |
| NC_029099.1_Klebsiella_phage_KP36                    | 0.649                    |
| NC_004348.1_Enterobacteria_phage_ST64T               | 0.646                    |
| NC_028774.1_Klebsiella_phage_Sushi                   | 0.636                    |
| NC_047841.1_Klebsiella_phage_KPN_N141                | 0.619                    |
| NC_049839.1_Klebsiella_phage_Sweeny                  | 0.61                     |
| NC_026010.1_Shigella_phage_pSf-2                     | 0.609                    |
| NC_002371.2_Salmonella_phage_P22                     | 0.599                    |
| NC_047857.1_Klebsiella_phage_phiKpS2                 | 0.599                    |
| NC_047847.1_Shigella_phage_Sd1                       | 0.598                    |
| NC_031019.1_Enterobacteria_phage_UAB_Phi20           | 0.598                    |
| NC_047848.1_Shigella_phage_Sf12                      | 0.595                    |
| NC_049842.1_Klebsiella_phage_vB_KpnS_15-38_KLPPOU149 | 0.589                    |
| NC_048043.1_Klebsiella_phage_NJS2                    | 0.584                    |
| NC_055956.1_Klebsiella_phage_RAD2                    | 0.569                    |
| NC_028696.2_Salmonella_phage_SEN22                   | 0.561                    |
| NC_048065.1_Citrobacter_phage_Sazh                   | 0.557                    |
| NC_019721.1_Enterobacterial_phage_mEp390             | 0.554                    |
| NC_047893.1_Escherichia_phage_DTL                    | 0.546                    |
| NC_049841.1_Klebsiella_phage_Skenney                 | 0.533                    |
| NC_013059.1_Salmonella_phage_c341                    | 0.521                    |
| NC_018279.1_Salmonella_phage_vB_SosS_Oslo            | 0.519                    |
| NC_042346.1_Salmonella_virus_BTP1                    | 0.515                    |
| NC_048024.1_Klebsiella_phage_NJS1                    | 0.512                    |
| NC_047998.1_Shigella_phage_Sfin-1                    | 0.512                    |
| NC_049813.1_Escherichia_phage_vB_EcoS-122101         | 0.5                      |
| NC_042046.1_Escherichia_phage_C119                   | 0.493                    |
| NC_047742.1_Enterobacteria_phage_IME_EC2             | 0.492                    |
| NC_025443.1_Salmonella_phage_9NA                     | 0.492                    |
| NC_048143.1_Klebsiella_phage_KpKT21phi1              | 0.484                    |
| NC_049831.1_Shigella_virus_Sfin-3                    | 0.472                    |
| NC_015295.1_Erwinia_phage_phiEt88                    | 0.47                     |
| NC_047810.1_Escherichia_phage_vB_EcoS-IME253         | 0.467                    |
| NC_031946.1_Salmonella_Phage_103203_sal5             | 0.457                    |
| NC_023006.1_Pseudomonas_phage_PPpW-3                 | 0.448                    |
| NC_048044.1_Klebsiella_phage_NJR15                   | 0.436                    |
| NC_047959.1_Enterobacteria_phage_vB_EcoS_IME18       | 0.436                    |
| NC_047785.1_Shigella_phage_SH6                       | 0.429                    |
| NC_049948.1_Escherichia_phage_Lambda_ev017           | 0.427                    |
| NC_021563.1_Serratia_phage_Eta                       | 0.426                    |
| NC_019445.1_Escherichia_phage_TL-2011b               | 0.425                    |



**Supplementary Table S10. Intergenomic similarities of RefSeq phage genomes to vB\_Kpn\_ZCKp20p, calculated by VIRIDIC**

| Genome                                                     | Intergenomic Similarity% |
|------------------------------------------------------------|--------------------------|
| NC_024789.1_Escherichia_phage_bV_EcoS_AKS96                | 0.419                    |
| NC_024793.1_Escherichia_phage_bV_EcoS_AHP42                | 0.414                    |
| NC_049926.1_Escherichia_phage_ECP1                         | 0.41                     |
| NC_048150.1_Shigella_phage_vB_SsoS_008                     | 0.391                    |
| NC_048126.1_Klebsiella_phage_TSK1                          | 0.389                    |
| NC_007603.1_Enterobacteria_phage_RTP                       | 0.386                    |
| NC_023743.1_Escherichia_phage_phiEB49                      | 0.383                    |
| NC_042043.1_Escherichia_phage_SRT8                         | 0.382                    |
| NC_048137.1_Pantoea_phage_vB_PagS_AAS23                    | 0.378                    |
| NC_048208.1_Enterobacteria_phage_vB_EcoS_IME542            | 0.372                    |
| NC_024369.2_Vibrio_phage_X29                               | 0.372                    |
| NC_011976.1_Salmonella_phage_epsilon34                     | 0.368                    |
| NC_019404.1_Enterobacteria_phage_vB_EcoS_ACG-M12           | 0.36                     |
| NC_049832.1_Escherichia_phage_vB_EcoS-DELF2_DNA            | 0.358                    |
| NC_055836.1_Xanthomonas_phage_FoX2                         | 0.355                    |
| NC_024210.1_Escherichia_phage_e4/lc                        | 0.348                    |
| NC_015456.1_Shigella_phage_Shfl1                           | 0.34                     |
| NC_047740.1_Enterobacteria_phage_phiJLA23                  | 0.338                    |
| NC_041995.1_Shigella_phage_vB_SsoS-ISF002                  | 0.338                    |
| NC_041873.1_Escherichia_phage_JMPW2                        | 0.337                    |
| NC_019718.1_Enterobacteria_phage_vB_EcoS_Rogue1            | 0.334                    |
| NC_007291.1_Enterobacteria_phage_JK06                      | 0.333                    |
| NC_024784.1_Escherichia_phage_bV_EcoS_AHS24                | 0.332                    |
| NC_054149.1_Pseudomonas_phage_Persinger                    | 0.321                    |
| NC_048181.1_Raoultella_phage_RP180                         | 0.32                     |
| NC_029066.1_Pseudomonas_phage_PS-1_DNA                     | 0.316                    |
| NC_019710.1_Enterobacteria_phage_HK140                     | 0.315                    |
| NC_019706.1_Enterobacteria_phage_mEp043_c-1                | 0.314                    |
| NC_028699.1_Salmonella_phage_SEN34                         | 0.31                     |
| NC_019720.1_Enterobacterial_phage_mEp213                   | 0.31                     |
| NC_030929.1_Pseudomonas_phage_JBD44                        | 0.292                    |
| NC_019725.1_Escherichia_phage_ADB-2                        | 0.286                    |
| NC_019545.1_Salmonella_phage_SPN3UB                        | 0.285                    |
| NC_028786.1_Klebsiella_phage_1513                          | 0.271                    |
| NC_042038.1_Enterobacteriophage_phiKP26                    | 0.266                    |
| NC_021777.1_Salmonella_phage_Jersey                        | 0.265                    |
| NC_047812.1_Escherichia_phage_vB_Ecos_CEB_EC3a             | 0.262                    |
| NC_054465.1_Aeromonas_phage_2_D05                          | 0.262                    |
| NC_049941.1_Stx2-converting_phage_Stx2a_WGPS2_proviral_DNA | 0.257                    |
| NC_016762.1_Pseudomonas_phage_phi297                       | 0.255                    |
| NC_020205.1_Xanthomonas_citri_phage_CP2_DNA                | 0.251                    |



**Supplementary Table S10. Intergenomic similarities of RefSeq phage genomes to vB\_Kpn\_ZCKp20p, calculated by VIRIDIC**

| Genome                                                     | Intergenomic Similarity% |
|------------------------------------------------------------|--------------------------|
| NC_005833.1_Enterobacteria_phage_T1                        | 0.25                     |
| NC_019717.1_Enterobacteria_phage_HK225                     | 0.249                    |
| NC_021190.1_Enterobacteria_phage_phi80                     | 0.246                    |
| NC_030909.1_Pseudomonas_phage_YMC11/07/P54_PAE_BP          | 0.232                    |
| NC_047786.1_Salmonella_phage_vB_SenS_Sasha                 | 0.21                     |
| NC_047828.1_Escherichia_phage_vB_EcoS_SH2                  | 0.204                    |
| NC_047960.1_Enterobacteria_phage_vB_EcoS_IME347            | 0.204                    |
| NC_048130.1_Klebsiella_phage_KN4-1_DNA                     | 0.189                    |
| NC_028819.1_Pseudoalteromonas_Phage_H103                   | 0.189                    |
| NC_047908.1_Klebsiella_phage_SH-Kp_152410                  | 0.187                    |
| NC_003356.1_Enterobacteria_phage_phiP27                    | 0.183                    |
| NC_055838.1_Xanthomonas_phage_FoX5                         | 0.179                    |
| NC_029019.1_Stenotrophomonas_phage_vB_SmaS-DLP_2           | 0.179                    |
| NC_019419.2_Enterobacteria_phage_JL1                       | 0.178                    |
| NC_055835.1_Xanthomonas_phage_FoX1                         | 0.177                    |
| NC_047863.1_Shigella_phage_vB_SflS-ISF001                  | 0.169                    |
| NC_049466.2_Escherichia_phage_vB_EcoM_4HA13                | 0.168                    |
| NC_049944.1_Stx2-converting_phage_Stx2a_WGPS8_proviral_DNA | 0.164                    |
| NC_019711.1_Enterobacteria_phage_HK629                     | 0.162                    |
| NC_048875.1_Pantoea_phage_vB_PagM_SSEM1                    | 0.162                    |
| NC_010116.1_Pseudomonas_phage_YuA                          | 0.16                     |
| NC_049945.1_Stx2-converting_phage_Stx2a_WGPS6_proviral_DNA | 0.16                     |
| NC_049923.1_Stx2-converting_phage_Stx2a_WGPS9_proviral_DNA | 0.159                    |
| NC_028695.2_Enterobacter_phage_phiEap-2                    | 0.159                    |
| NC_019716.1_Enterobacteria_phage_mEp460                    | 0.146                    |
| NC_041897.1_Escherichia_phage_K1ind1                       | 0.143                    |
| NC_019709.1_Enterobacteria_phage_mEpX1                     | 0.142                    |
| NC_027994.1_Escherichia_phage_K1H                          | 0.142                    |
| NC_027993.1_Escherichia_phage_K1G                          | 0.139                    |
| NC_021776.1_Vibrio_phage_vpms1                             | 0.138                    |
| NC_054466.1_Aeromonas_phage_4_D05                          | 0.13                     |
| NC_052975.1_Klebsiella_phage_YMC16/01/N133_KPN_BP          | 0.125                    |
| NC_022752.1_Salmonella_phage_SETP13                        | 0.12                     |
| NC_047821.1_Marinomonas_phage_CPP1m                        | 0.116                    |
| NC_047836.1_Marinomonas_phage_CB5A                         | 0.115                    |
| NC_048799.1_Escherichia_phage_Mangalitsa                   | 0.107                    |
| NC_010106.1_Enterobacteria_phage_phiEcoM-GJ1               | 0.106                    |
| NC_019540.1_Salinivibrio_phage_CW02                        | 0.106                    |
| NC_048845.1_Escherichia_phage_flopper                      | 0.105                    |
| NC_031274.1_Pseudomonas_phage_O4                           | 0.105                    |
| NC_047830.1_Escherichia_phage_ST32                         | 0.104                    |



**Supplementary Table S10. Intergenomic similarities of RefSeq phage genomes to vB\_Kpn\_ZCKp20p, calculated by VIRIDIC**

| Genome                                         | Intergenomic Similarity% |
|------------------------------------------------|--------------------------|
| NC_025463.1_Shewanella_sp._phage_1/44          | 0.098                    |
| NC_011373.1_Pseudomonas_phage_PAJU2            | 0.096                    |
| NC_047978.1_Erwinia_phage_Faunus               | 0.093                    |
| NC_019767.1_Enterobacteria_phage_HK544         | 0.092                    |
| NC_012223.2_Enterobacteria_phage_SSL2009a      | 0.092                    |
| NC_004902.1_Xanthomonas_phage_Xp10             | 0.09                     |
| NC_007809.1_Pseudomonas_phage_M6               | 0.087                    |
| NC_020841.1_Psychrobacter_phage_pOW20-A        | 0.087                    |
| NC_027383.1_Escherichia_phage_YD-2008.s        | 0.084                    |
| NC_027980.1_Enterobacter_phage_phiKDA1         | 0.082                    |
| NC_031077.1_Enterobacter_phage_Tyrion          | 0.082                    |
| NC_042084.1_Escherichia_phage_VB_EcoS-Golestan | 0.081                    |
| NC_055837.1_Xanthomonas_phage_FoX3             | 0.08                     |
| NC_019724.1_Enterobacteria_phage_HK578         | 0.08                     |
| NC_028901.1_Escherichia_phage_slur05           | 0.08                     |
| NC_031081.1_Escherichia_phage_Envy             | 0.079                    |
| NC_031113.1_Escherichia_phage_Gluttony         | 0.079                    |
| NC_041924.1_Acinetobacter_phage_WCHABP12       | 0.079                    |
| NC_041966.1_Acinetobacter_phage_WCHABP1        | 0.078                    |
| NC_026611.1_Ewardsiella_phage_GF-2_DNA,        | 0.076                    |
| NC_027330.1_Escherichia_phage_ECBP5            | 0.072                    |
| NC_019527.1_Aeromonas_phage_vB_AsaM-56         | 0.071                    |
| NC_028956.1_Mannheimia_phage_vB_MhS_1152AP2    | 0.071                    |
| NC_047791.1_Pectobacterium_phage_PP101         | 0.067                    |
| NC_016158.1_Escherichia_phage_HK639            | 0.065                    |
| NC_023865.1_Pectobacterium_phage_PM1           | 0.065                    |
| NC_023605.1_Vibrio_phage_PVA1                  | 0.064                    |
| NC_019485.1_Enterobacter_phage_EcP1            | 0.063                    |
| NC_020846.1_Vibrio_phage_pYD21-A               | 0.063                    |
| NC_019518.1_Vibrio_phage_vB_VchM-138           | 0.062                    |
| NC_005069.1_Yersinia_phage_PY54                | 0.059                    |
| NC_049950.1_Escherichia_virus_Lambda_2H1       | 0.053                    |
| NC_053014.1_Pectobacterium_phage_MA11          | 0.052                    |
| NC_024146.1_Enterobacteria_phage_9g            | 0.051                    |
| NC_053015.1_Pectobacterium_phage_MA12          | 0.05                     |
| NC_016765.1_Pseudomonas_phage_PMG1             | 0.043                    |
| NC_002484.2_Bacteriophage_D3                   | 0.042                    |
| NC_019722.1_Vibrio_phage_vB_VpaM_MAR           | 0                        |
| NC_004456.1_Vibrio_phage_VHML                  | 0                        |
| NC_027981.1_Vibrio_phage_VP58.5                | 0                        |
| NC_007807.1_Pseudomonas_phage_119X             | 0                        |





**Supplementary Table S10. Intergenomic similarities of RefSeq phage genomes to vB\_Kpn\_ZCKp20p, calculated by VIRIDIC**

| Genome                                        | Intergenomic Similarity% |
|-----------------------------------------------|--------------------------|
| NC_005884.1_Pseudomonas_phage_PaP2            | 0                        |
| NC_055711.1_Pseudomonas_phage_PaMx41          | 0                        |
| NC_054890.1_Pseudomonas_phage_vB_PsyP_3MF5    | 0                        |
| NC_023005.1_Pseudomonas_phage_PPpW-4_DNA      | 0                        |
| NC_047965.1_Pseudomonas_phage_22PfluR64PP     | 0                        |
| NC_047997.1_Pseudomonas_phage_PFP1            | 0                        |
| NC_015264.1_Pseudomonas_phage_phiBB-PF7A      | 0                        |
| NC_021062.1_Pseudomonas_phage_Phi-S1          | 0                        |
| NC_047981.1_Pseudomonas_phage_PspYZU08        | 0                        |
| NC_048201.1_Pseudomonas_phage_17A             | 0                        |
| NC_047826.1_Pseudomonas_virus_WRT             | 0                        |
| NC_047827.1_Pseudomonas_virus_KNP             | 0                        |
| NC_024362.1_Pseudomonas_phage_phiPSA2         | 0                        |
| NC_047747.1_Pseudomonas_phage_phiPsa17        | 0                        |
| NC_047922.1_Pseudomonas_phage_Henninger       | 0                        |
| NC_028661.1_Pseudomonas_phage_PPPL-1          | 0                        |
| NC_048200.1_Pseudomonas_phage_shl2            | 0                        |
| NC_048025.1_Shigella_phage_SFPH2              | 0                        |
| NC_048071.1_Escherichia_phage_IMM-002         | 0                        |
| NC_031943.1_Escherichia_phage_vB_EcoP_GA2A    | 0                        |
| NC_047777.1_Escherichia_phage_ZG49            | 0                        |
| NC_048059.1_Dickeya_phage_Luksen              | 0                        |
| NC_048060.1_Dickeya_phage_Mysterion           | 0                        |
| NC_047961.1_Dickeya_phage_Dagda               | 0                        |
| NC_048057.1_Dickeya_phage_Katbat              | 0                        |
| NC_047797.2_Pectobacterium_phage_PP81         | 0                        |
| NC_047801.2_Pectobacterium_phage_PP47         | 0                        |
| NC_048052.1_Dickeya_phage_vB_DsoP_JA10        | 0                        |
| NC_047936.1_Yersinia_phage_fPS-53             | 0                        |
| NC_047937.1_Yersinia_phage_fPS-54-ocr         | 0                        |
| NC_028863.1_Escherichia_phage_P694            | 0                        |
| NC_028822.1_Escherichia_phage_P483            | 0                        |
| NC_048180.1_Shigella_phage_VB_Ship_A7         | 0                        |
| NC_047856.1_Enterobacter_phage_KNP3           | 0                        |
| NC_047780.1_Klebsiella_phage_vB_KpnP_PRA33    | 0                        |
| NC_047781.1_Klebsiella_phage_vB_KpnP_BIS33    | 0                        |
| NC_047782.1_Klebsiella_phage_vB_KpnP_IL33     | 0                        |
| NC_047772.1_Klebsiella_phage_vB_KpnP_KpV767   | 0                        |
| NC_013647.1_Klebsiella_phage_KP32             | 0                        |
| NC_028800.1_Klebsiella_phage_K5               | 0                        |
| NC_047969.1_Klebsiella_virus_KP32_isolate_194 | 0                        |



**Supplementary Table S10. Intergenomic similarities of RefSeq phage genomes to vB\_Kpn\_ZCKp20p, calculated by VIRIDIC**

| Genome                                            | Intergenomic Similarity% |
|---------------------------------------------------|--------------------------|
| NC_047771.1_Klebsiella_phage_vB_KpnP_KpV763       | 0                        |
| NC_047968.1_Klebsiella_virus_KP32_isolate_192     | 0                        |
| NC_047842.1_Klebsiella_phage_2044-307w            | 0                        |
| NC_048175.1_Klebsiella_phage_Pharr                | 0                        |
| NC_048131.1_Klebsiella_phage_KN3-1_DNA            | 0                        |
| NC_048138.1_Klebsiella_phage_Henu1                | 0                        |
| NC_011043.1_Klebsiella_phage_K11                  | 0                        |
| NC_047798.1_Klebsiella_phage_K5-2                 | 0                        |
| NC_047799.1_Klebsiella_phage_K5-4                 | 0                        |
| NC_048129.1_Klebsiella_phage_KN1-1_DNA            | 0                        |
| NC_047971.1_Klebsiella_virus_KP32_isolate_196     | 0                        |
| NC_015719.1_Enterobacteria_phage_K30              | 0                        |
| NC_028977.1_Klebsiella_phage_vB_KpnP_KpV289       | 0                        |
| NC_047773.1_Klebsiella_phage_vB_KpnP_KpV766       | 0                        |
| NC_047761.1_Klebsiella_phage_vB_KpnP_IME205       | 0                        |
| NC_047970.1_Klebsiella_virus_KP32_isolate_195     | 0                        |
| NC_047980.1_Klebsiella_phage_SH-Kp_152234         | 0                        |
| NC_028688.1_Klebsiella_phage_vB_Kp1               | 0                        |
| NC_048114.1_Klebsiella_phage_kpssk3               | 0                        |
| NC_047886.1_Pectobacterium_phage_DU_PP_II         | 0                        |
| NC_047963.1_Pectobacterium_phage_Jarilo           | 0                        |
| NC_054460.1_Xanthomonas_phage_KPhi1               | 0                        |
| NC_054461.1_Xanthomonas_virus_phiXaf18            | 0                        |
| NC_007710.1_Xanthomonas_oryzae_phage_OP2_DNA      | 0                        |
| NC_054458.1_Xanthomonas_phage_XPP1                | 0                        |
| NC_054459.1_Xanthomonas_phage_XPV1                | 0                        |
| NC_005841.1_Enterobacteria_phage_ST104_DNA        | 0                        |
| NC_011802.1_Salmonella_enterica_bacteriophage_SE1 | 0                        |
| NC_014900.1_Salmonella_phage_ST160                | 0                        |
| NC_017985.1_Salmonella_phage_SPN9CC               | 0                        |
| NC_030919.1_Salmonella_phage_118970_sal4          | 0                        |
| NC_054464.1_Edwardsiella_phage_Edno5              | 0                        |
| NC_052979.1_Providencia_phage_Kokobel1            | 0                        |
| NC_052980.1-Proteus_phage_ASh-2020a               | 0                        |
| NC_052981.1-Proteus_phage_PM87                    | 0                        |
| NC_052982.1-Proteus_phage_P16-2532                | 0                        |
| NC_028812.1-Proteus_phage_pPM_01                  | 0                        |
| NC_052983.1_Escherichia_phage_E21                 | 0                        |
| NC_052987.1_Klebsiella_phage_KPN_N98              | 0                        |
| NC_048670.1_Klebsiella_phage_KPN_N137             | 0                        |
| NC_052988.1_Klebsiella_phage_KPN_U2874            | 0                        |



**Supplementary Table S10. Intergenomic similarities of RefSeq phage genomes to vB\_Kpn\_ZCKp20p, calculated by VIRIDIC**

| Genome                                          | Intergenomic Similarity% |
|-------------------------------------------------|--------------------------|
| NC_048732.1_Klebsiella_phage_Seifer             | 0                        |
| NC_048805.1_Klebsiella_phage_Soft               | 0                        |
| NC_018832.1_Providencia_phage_Redjac            | 0                        |
| NC_053008.1_Salmonella_phage_SAP012_DNA         | 0                        |
| NC_031930.1_Salmonella_phage_118970_sal1        | 0                        |
| NC_048683.1_Salmonella_phage_KFS-SE1            | 0                        |
| NC_021315.1_Enterobacteria_phage_Chi            | 0                        |
| NC_025442.1_Salmonella_phage_Chi                | 0                        |
| NC_048655.1_Salmonella_phage_BSPM4              | 0                        |
| NC_053000.1_Salmonella_phage_SeWh-1             | 0                        |
| NC_021780.1_Salmonella_phage_FSL_SP-088         | 0                        |
| NC_052997.1_Salmonella_phage_ST-118             | 0                        |
| NC_048648.1_Salmonella_phage_ST-101             | 0                        |
| NC_052998.1_Salmonella_phage_ST-374             | 0                        |
| NC_019417.1_Salmonella_phage_SPN19              | 0                        |
| NC_053002.1_Escherichia_phage_Utah              | 0                        |
| NC_053003.1_Salmonella_phage_vB_SalS_ABTNLsp1   | 0                        |
| NC_021783.1_Salmonella_phage_iEPS5              | 0                        |
| NC_053004.1_Salmonella_phage_TS13               | 0                        |
| NC_053005.1_Enterobacter_phage_KNP7             | 0                        |
| NC_053006.1_Salmonella_phage_ER3                | 0                        |
| NC_053007.1_Salmonella_phage_ER6                | 0                        |
| NC_048632.1_Salmonella_phage_35                 | 0                        |
| NC_052992.1_Salmonella_phage_KNP6               | 0                        |
| NC_052993.1_Salmonella_phage_ER19               | 0                        |
| NC_052994.1_Salmonella_phage_BPS1               | 0                        |
| NC_048727.1_Salmonella_phage_Siskin             | 0                        |
| NC_052995.1_Salmonella_phage_BPS2               | 0                        |
| NC_052996.1_Salmonella_phage_BPS4               | 0                        |
| NC_052991.1_Serratia_phage_KpYy_1_41            | 0                        |
| NC_021779.1_Salmonella_phage_FSL_SP-030         | 0                        |
| NC_052990.1_Salmonella_phage_Season12           | 0                        |
| NC_053013.1_Pseudomonas_phage_vB_Pae-SS2019XI   | 0                        |
| NC_042344.1_Phage_Sano                          | 0                        |
| NC_042345.1_Phage_Salvo                         | 0                        |
| NC_052973.1_Xylella_phage_Bacata                | 0                        |
| NC_052976.1_Pseudomonas_phage_PspYZU01          | 0                        |
| NC_007024.1_Xanthomonas_phage_Xp15              | 0                        |
| NC_028770.1_Pseudomonas_phage_PaMx11            | 0                        |
| NC_042115.1_Pseudomonas_phage_vB_PaeS_PA01_Ab19 | 0                        |
| NC_026594.1_Pseudomonas_phage_vB_PaeS_PA01_Ab18 | 0                        |



**Supplementary Table S10. Intergenomic similarities of RefSeq phage genomes to vB\_Kpn\_ZCKp20p, calculated by VIRIDIC**

| Genome                                         | Intergenomic Similarity% |
|------------------------------------------------|--------------------------|
| NC_052965.1_Pseudomonas_phage_ZC01             | 0                        |
| NC_004813.1_Enterobacteria_phage_BP-4795       | 0                        |
| NC_049942.1_Escherichia_phage_JLK-2012         | 0                        |
| NC_011356.1_Enterobacteria_phage_YYZ-2008      | 0                        |
| NC_009514.1_Phage_cdtI_DNA                     | 0                        |
| NC_049946.1_Escherichia_virus_Lambda_4A7       | 0                        |
| NC_049947.1_Escherichia_virus_Lambda_1H12      | 0                        |
| NC_049949.1_Escherichia_phage_Lambda_ev207     | 0                        |
| NC_019723.1_Enterobacteria_phage_HK630         | 0                        |
| NC_042057.1_Enterobacteria_phage_DE3           | 0                        |
| NC_001416.1_Enterobacteria_phage_lambda        | 0                        |
| NC_049951.1_Enterobacteria_phage_O276          | 0                        |
| NC_049952.1_Escherichia_virus_Lambda_2B8       | 0                        |
| NC_049953.1_Escherichia_phage_Lambda_ev099     | 0                        |
| NC_049954.1_Escherichia_virus_Lambda_2G7b      | 0                        |
| NC_049955.1_Escherichia_phage_Lambda_ev243     | 0                        |
| NC_002166.1_Bacteriophage_HK022                | 0                        |
| NC_019768.1_Enterobacteria_phage_HK106         | 0                        |
| NC_019704.1_Enterobacteria_phage_mEp237        | 0                        |
| NC_048803.1_Proteus_phage_Myduc                | 0                        |
| NC_019504.1_Erwinia_phage_vB_EamM-Y2           | 0                        |
| NC_025459.1_Aeromonas_phage_pAh6-C             | 0                        |
| NC_023594.2_Shewanella_phage_Spp001            | 0                        |
| NC_047824.1_Shewanella_phage_SppYZU05          | 0                        |
| NC_028879.1_Pseudomonas_phage_PaMx42           | 0                        |
| NC_024381.1_Pseudomonas_phage_vB_PaeS_SCH_Ab26 | 0                        |
| NC_017864.1_Pseudomonas_phage_vB_Pae-Kakheti25 | 0                        |
| NC_007806.1_Pseudomonas_phage_73               | 0                        |
| NC_023590.1_Acinetobacter_phage_IME_AB3        | 0                        |
| NC_042137.1_Acinetobacter_phage_vB_AbaS_Loki   | 0                        |
| NC_027378.1_Escherichia_phage_Seurat           | 0                        |
| NC_028776.1_Enterobacteria_phage_CAjan         | 0                        |
| NC_028997.1_Enterobacteria_phage_JenP2         | 0                        |
| NC_026610.2_Vibrio_phage_VpKK5                 | 0                        |
| NC_048878.1_Alteromonas_phage_vB_AcoS-R7M      | 0                        |
| NC_031058.1_Pseudomonas_phage_NP1              | 0                        |
| NC_041953.1_Pseudomonas_phage_PaMx25           | 0                        |
| NC_048687.1_Pseudomonas_phage_PMBT14           | 0                        |
| NC_048763.1_Salmonella_phage_SE13              | 0                        |
| NC_048864.1_Salmonella_phage_birk              | 0                        |
| NC_048863.1_Salmonella_phage_yarpen            | 0                        |



**Supplementary Table S10. Intergenomic similarities of RefSeq phage genomes to vB\_Kpn\_ZCKp20p, calculated by VIRIDIC**

| Genome                                             | Intergenomic Similarity% |
|----------------------------------------------------|--------------------------|
| NC_031250.1_Salmonella_phage_BP63                  | 0                        |
| NC_048649.1_Salmonella_phage_UPF_BP2               | 0                        |
| NC_048179.1_Salmonella_phage_ZCSE2                 | 0                        |
| NC_048764.1_Salmonella_phage_SE4                   | 0                        |
| NC_019522.1_Pectobacterium_phage_ZF40              | 0                        |
| NC_003907.2_Vibrio_phage_VpV262                    | 0                        |
| NC_021300.1_Pseudoalteromonas_phage_RIO-1          | 0                        |
| NC_048630.1_Pseudoalteromonas_phage_HP1            | 0                        |
| NC_025466.1_Shewanella_sp._phage_3/49              | 0                        |
| NC_021775.1_Salmonella_phage_FSL_SP-031            | 0                        |
| NC_026017.1_Salmonella_phage_LSPA1                 | 0                        |
| NC_009232.2_Salmonella_phage_SETP3                 | 0                        |
| NC_041991.1_Salmonella_phage_vB_SenS_AG11          | 0                        |
| NC_022754.1_Salmonella_phage_SETP7                 | 0                        |
| NC_023608.1_Salmonella_phage_vB_SenS-Ent2          | 0                        |
| NC_019539.1_Salmonella_phage_vB_SenS-Ent1          | 0                        |
| NC_024204.1_Salmonella_phage_vB_SenS-Ent3          | 0                        |
| NC_028698.1_Salmonella_phage_f18SE                 | 0                        |
| NC_031021.1_Salmonella_phage_MA12                  | 0                        |
| NC_031925.1_Salmonella_phage_BPS11Q3               | 0                        |
| NC_016763.1_Salmonella_phage_SE2                   | 0                        |
| NC_006940.2_Salmonella_phage_SS3e                  | 0                        |
| NC_041992.1_Salmonella_phage_wks13                 | 0                        |
| NC_041898.1_Escherichia_phage_K1ind2               | 0                        |
| NC_030923.1_Pseudomonas_phage_YMC11/06/C171_PPU_BP | 0                        |
| NC_029081.1_Pectobacterium_phage_Peat1             | 0                        |
| NC_041854.1_Pectobacterium_phage_PhiM1             | 0                        |
| NC_048117.1_Pectobacterium_phage_Khlen             | 0                        |
| NC_048061.1_Pectobacterium_phage_Nobby             | 0                        |
| NC_048116.1_Pectobacterium_phage_Clickz            | 0                        |
| NC_048118.1_Pectobacterium_phage_Koot              | 0                        |
| NC_031096.1_Pectobacterium_phage_PP90              | 0                        |
| NC_048120.1_Pectobacterium_phage_Zenivior          | 0                        |
| NC_048119.1_Pectobacterium_phage_Phoria            | 0                        |
| NC_042131.1_Pectobacterium_phage_vB_PatP_CB5       | 0                        |
| NC_048056.1_Pectobacterium_phage_Gaspode           | 0                        |
| NC_048058.1_Pectobacterium_phage_Lelidair          | 0                        |
| NC_047759.1_Dickeya_phage_BF25/12                  | 0                        |
| NC_031068.2_Pectobacterium_phage_PP16              | 0                        |
| NC_048103.1_Pectobacterium_phage_PPWS2_DNA         | 0                        |
| NC_048148.1_Providencia_phage_vB_PstP_PS3          | 0                        |



**Supplementary Table S10. Intergenomic similarities of RefSeq phage genomes to vB\_Kpn\_ZCKp20p, calculated by VIRIDIC**

| Genome                                             | Intergenomic Similarity% |
|----------------------------------------------------|--------------------------|
| NC_027342.1_Proteus_phage_PM16                     | 0                        |
| NC_027363.1_Proteus_phage_PM_75                    | 0                        |
| NC_048167.1_Vibrio_phage_vB_VpaS_OWB               | 0                        |
| NC_012662.1_Vibrio_phage_VP93                      | 0                        |
| NC_048035.1_Vibrio_phage_vB_VpaP_KF1               | 0                        |
| NC_048036.1_Vibrio_phage_vB_VpaP_KF2               | 0                        |
| NC_019454.1_Pantoea_phage_LIMElight                | 0                        |
| NC_047929.1_Shigella_phage_SFN6B                   | 0                        |
| NC_047787.1_Klebsiella_phage_KPV811                | 0                        |
| NC_048172.1_Escherichia_phage_Minorna              | 0                        |
| NC_023567.2_Klebsiella_phage_F19                   | 0                        |
| NC_047811.1_Klebsiella_phage_vB_KpnP_KpV74         | 0                        |
| NC_047849.1_Klebsiella_phage_AltoGao               | 0                        |
| NC_028664.1_Klebsiella_phage_vB_Kp2                | 0                        |
| NC_047748.1_Klebsiella_phage_phiBO1E               | 0                        |
| NC_013649.2_Klebsiella_phage_KP34                  | 0                        |
| NC_028816.1_Klebsiella_phage_vB_KpnP_SU503         | 0                        |
| NC_028670.1_Klebsiella_phage_vB_KpnP_KpV41         | 0                        |
| NC_025418.1_Klebsiella_phage_NTUH-K2044-K1-1_DNA   | 0                        |
| NC_031025.1_Klebsiella_phage_vB_KpnP_KpV475        | 0                        |
| NC_031246.1_Klebsiella_phage_vB_KpnP_KpV71         | 0                        |
| NC_047783.1_Klebsiella_phage_vB_KpnP_KpV48         | 0                        |
| NC_047944.1_Klebsiella_phage_myPSH1235             | 0                        |
| NC_047779.1_Klebsiella_phage_KP-Rio/2015           | 0                        |
| NC_028870.1_Klebsiella_phage_vB_KpnP_SU552A        | 0                        |
| NC_048174.1_Shigella_phage_HRP29                   | 0                        |
| NC_015585.1_Pantoea_phage_LIMEzero                 | 0                        |
| NC_025445.1_Enterobacteria_phage_J8-65             | 0                        |
| NC_048177.1_Escherichia_phage_Lidtsur              | 0                        |
| NC_047933.1_Pseudomonas_phage_phiNV3               | 0                        |
| NC_009935.1_Pseudomonas_phage_LKD16                | 0                        |
| NC_012418.1_Pseudomonas_phage_phikF77              | 0                        |
| NC_022091.1_Pseudomonas_phage_MPK7                 | 0                        |
| NC_027375.1_Pseudomonas_phage_vB_PaeP_PPA-ABTNL    | 0                        |
| NC_047967.1_Pseudomonas_phage_vB_PaeP_PAO1_1-15pyo | 0                        |
| NC_011105.1_Pseudomonas_phage_PT5                  | 0                        |
| NC_017865.1_Pseudomonas_phage_vB_Pae-TbilisiM32    | 0                        |
| NC_047852.1_Pseudomonas_phage_phiNFS               | 0                        |
| NC_005045.1_Pseudomonas_phage_phiKMV               | 0                        |
| NC_011107.1_Pseudomonas_phage_PT2                  | 0                        |
| NC_026602.1_Pseudomonas_phage_vB_PaeP_PAO1_Ab05    | 0                        |



**Supplementary Table S10. Intergenomic similarities of RefSeq phage genomes to vB\_Kpn\_ZCKp20p, calculated by VIRIDIC**

| Genome                                              | Intergenomic Similarity% |
|-----------------------------------------------------|--------------------------|
| NC_047953.1_Pseudomonas_phage_vB_PaeP_130_113       | 0                        |
| NC_010326.1_Pseudomonas_phage_LUZ19                 | 0                        |
| NC_022746.1_Pseudomonas_phage_MPK6                  | 0                        |
| NC_047952.1_Pseudomonas_phage_PAXYB1                | 0                        |
| NC_028836.1_Pseudomonas_phage_DL62                  | 0                        |
| NC_048168.1_Pseudomonas_phage_RLP                   | 0                        |
| NC_009936.1_Pseudomonas_phage_LKA1                  | 0                        |
| NC_013638.1_Pseudomonas_phage_phi-2                 | 0                        |
| NC_028684.1_Acinetobacter_phage_vB_AbaP_PD-6A3      | 0                        |
| NC_047896.1_Acinetobacter_phage_SWH-Ab-1            | 0                        |
| NC_028679.1_Acinetobacter_phage_vB_AbaP_PD-AB9      | 0                        |
| NC_041905.1_Acinetobacter_phage_SH-Ab_15519         | 0                        |
| NC_041967.1_Acinetobacter_phage_WCHABP5             | 0                        |
| NC_031086.1_Acinetobacter_phage_phiAB6              | 0                        |
| NC_042004.1_Acinetobacter_phage_vB_AbaP_B3          | 0                        |
| NC_028675.1_Acinetobacter_phage_phiAB1              | 0                        |
| NC_021316.1_Acinetobacter_phage_Abp1                | 0                        |
| NC_047883.1_Acinetobacter_phage_SWH-Ab-3            | 0                        |
| NC_028848.1_Acinetobacter_phage_Fri1                | 0                        |
| NC_041915.1_Acinetobacter_phage_vB_AbaP_AS11        | 0                        |
| NC_041914.1_Acinetobacter_phage_vB_AbaP_AS12        | 0                        |
| NC_048081.1_Acinetobacter_phage_vB_AbaP_B09_Aci08   | 0                        |
| NC_042006.1_Acinetobacter_phage_vB_ApiP_P1          | 0                        |
| NC_042007.1_Acinetobacter_phage_vB_ApiP_P2          | 0                        |
| NC_042003.1_Acinetobacter_phage_vB_AbaP_B1          | 0                        |
| NC_042005.1_Acinetobacter_phage_vB_AbaP_B5          | 0                        |
| NC_048076.1_Acinetobacter_phage_vB_AbaP_46-62_Aci07 | 0                        |
| NC_028987.2_Acinetobacter_phage_IME200              | 0                        |
| NC_048142.1_Acinetobacter_phage_AbKT21phiIII        | 0                        |
| NC_023570.1_Acinetobacter_phage_Petty               | 0                        |
| NC_025457.1_Acinetobacter_phage_vB_AbaP_Acibel007   | 0                        |
| NC_047741.1_Vibrio_phage_JSF7                       | 0                        |
| NC_047834.1_Alteromonas_virus_vB_AspP-H4/4          | 0                        |
| NC_019520.1_Escherichia_phage_phiKT                 | 0                        |
| NC_047890.1_Escherichia_phage_PGT2                  | 0                        |
| NC_047941.1_Salmonella_phage_vB_SpuP_Spp16          | 0                        |
| NC_047865.1_Aeromonas_phage_CF7                     | 0                        |
| NC_047866.1_Aeromonas_phage_Ahp1                    | 0                        |
| NC_019528.1_Aeromonas_phage_phiAS7                  | 0                        |
| NC_047966.1_Aeromonas_phage_25AhydR2PP              | 0                        |
| NC_028850.1_Yersinia_phage_vB_YenP_ISAO8            | 0                        |



**Supplementary Table S10. Intergenomic similarities of RefSeq phage genomes to vB\_Kpn\_ZCKp20p, calculated by VIRIDIC**

| Genome                                                 | Intergenomic Similarity% |
|--------------------------------------------------------|--------------------------|
| NC_047951.1_Yersinia_phage_phiR8-01                    | 0                        |
| NC_019911.2_Yersinia_phage_phi80-18                    | 0                        |
| NC_047805.1_Yersinia_phage_fHe-Yen3-01                 | 0                        |
| NC_047778.1_Pectobacterium_phage_PP2                   | 0                        |
| NC_048111.1_Pectobacterium_phage_Arno160               | 0                        |
| NC_020078.1_Cronobacter_sakazakii_phage_vB_CskP_GAP227 | 0                        |
| NC_029070.1_Cronobacter_phage_Dev-CD-23823             | 0                        |
| NC_047917.1_Erwinia_phage_vB_EamP-S2                   | 0                        |
| NC_009014.1_Erwinia_amylovora_phage_Era103             | 0                        |
| NC_019926.1_Erwinia_amylovora_phage_phiEa100           | 0                        |
| NC_019542.1_Pectobacterium_phage_PP1                   | 0                        |
| NC_025450.1_Lelliottia_phage_phD2B                     | 0                        |
| NC_019403.1_Enterobacteria_phage_vB_EcoP_ACG-C91       | 0                        |
| NC_047889.1_Escherichia_virus_mutPK1A2                 | 0                        |
| NC_007637.1_Enterobacteria_phage_K1E                   | 0                        |
| NC_047806.1_Escherichia_phage_vB_EcoP_B                | 0                        |
| NC_047807.1_Escherichia_phage_vB_EcoP_C                | 0                        |
| NC_047899.1_Escherichia_virus_VEc3                     | 0                        |
| NC_008152.1_Enterobacteria_phage_K1-5                  | 0                        |
| NC_047769.1_Escherichia_virus_AAPEc6                   | 0                        |
| NC_047920.1_Citrobacter_phage_vB_CroP_CrRp3            | 0                        |
| NC_048064.1_Escherichia_phage_LL11                     | 0                        |
| NC_004831.2_Enterobacteria_phage_SP6                   | 0                        |
| NC_020414.2_Salmonella_phage_UAB_Phi78                 | 0                        |
| NC_031271.1_Salmonella_phage_BP12B                     | 0                        |
| NC_047858.1_Proteus_phage_PM_116                       | 0                        |
| NC_027379.1_Proteus_phage_PM_85                        | 0                        |
| NC_027390.1_Proteus_phage_PM_93                        | 0                        |
| NC_028916.1_Proteus_phage_vB_PmiP_Pm5460               | 0                        |
| NC_047802.1_Pectobacterium_phage_PP99                  | 0                        |
| NC_047956.1_Pseudomonas_phage_Achelous                 | 0                        |
| NC_047955.1_Pseudomonas_phage_Nerthus                  | 0                        |
| NC_047957.1_Pseudomonas_phage_Alpheus                  | 0                        |
| NC_047894.1_Pseudomonas_phage_uligo                    | 0                        |
| NC_047954.1_Pseudomonas_phage_Njord                    | 0                        |
| NC_047903.1_Vibrio_phage_VEN                           | 0                        |
| NC_047746.1_Vibrio_phage_Vc1                           | 0                        |
| NC_047803.1_Vibrio_phage_Vp670                         | 0                        |
| NC_025822.1_Vibrio_phage_phi-A318                      | 0                        |
| NC_047737.1_Vibrio_phage_AS51                          | 0                        |
| NC_009543.1_Xanthomonas_phage_Xop411                   | 0                        |





**Supplementary Table S10. Intergenomic similarities of RefSeq phage genomes to vB\_Kpn\_ZCKp20p, calculated by VIRIDIC**

| Genome                                           | Intergenomic Similarity% |
|--------------------------------------------------|--------------------------|
| NC_012742.1_Xanthomonas_phage_phiL7              | 0                        |
| NC_019933.2_Xanthomonas_phage_CP1_DNA            | 0                        |
| NC_022982.1_Xylella_phage_Paz                    | 0                        |
| NC_022987.1_Xylella_phage_Prado                  | 0                        |
| NC_047762.1_Xanthomonas_phage_XAJ24              | 0                        |
| NC_047840.1_Xanthomonas_phage_phi_Xc10           | 0                        |
| NC_030928.1_Xanthomonas_phage_f20-Xaj            | 0                        |
| NC_030937.1_Xanthomonas_phage_f30-Xaj            | 0                        |
| NC_041885.1_Pseudomonas_phage_VSW-3              | 0                        |
| NC_042104.1_Pseudomonas_phage_PollyC             | 0                        |
| NC_016764.1_Pseudomonas_phage_Bf7                | 0                        |
| NC_031014.1_Pseudomonas_phage_Andromeda          | 0                        |
| NC_041925.1_Proteus_phage_VB_PmiS-Isfahan        | 0                        |
| NC_042103.1_Pseudomonas_phage_Bjorn              | 0                        |
| NC_017971.2_Pseudomonas_phage_tf                 | 0                        |
| NC_018850.2_Pseudomonas_phage_UFV-P2             | 0                        |
| NC_042107.1_Pseudomonas_phage_NV1                | 0                        |
| NC_028933.1_Pseudomonas_phage_PhiCHU             | 0                        |
| NC_004466.2_Pseudomonas_aeruginosa_phage_PaP3    | 0                        |
| NC_019813.1_Pseudomonas_phage_vB_PaeP_p2-10_Or1  | 0                        |
| NC_026599.1_Pseudomonas_phage_vB_PaeP_C2-10_Ab22 | 0                        |
| NC_010325.1_Pseudomonas_phage_LUZ24              | 0                        |
| NC_023583.1_Pseudomonas_phage_TL                 | 0                        |
| NC_042343.1_Pseudomonas_phage_PaP4               | 0                        |
| NC_022971.1_Pseudomonas_phage_phiBB-PAA2         | 0                        |
| NC_028919.1_Pseudomonas_phage_DL54               | 0                        |
| NC_019457.1_Vibrio_phage_CP-T1                   | 0                        |
| NC_020082.1_Edwardsiella_phage_MSW-3_DNA         | 0                        |
| NC_021342.2_Edwardsiella_phage_Pei21             | 0                        |
| NC_041900.1_Klebsiella_phage_vB_KpnM_KpV52       | 0                        |
| NC_020204.1_Klebsiella_phage_JD001               | 0                        |
| NC_042041.1_Klebsiella_phage_vB_KpnM_KpV79       | 0                        |
| NC_023555.1_Edwardsiella_phage_eiAU-183          | 0                        |
| NC_042029.1_Edwardsiella_phage_eiAU              | 0                        |
| NC_016566.1_Shigella_phage_EP23                  | 0                        |
| NC_013600.1_Sodalis_phage_SO-1                   | 0                        |
| NC_024783.1_Enterobacteria_phage_EK99P-1         | 0                        |
| NC_028995.1_Acinetobacter_phage_phiAC-1          | 0                        |
| NC_017984.1_Acinetobacter_bacteriophage_AP22     | 0                        |
| NC_042028.1_Acinetobacter_phage_AB1              | 0                        |
| NC_041998.1_Acinetobacter_phage_AbP2             | 0                        |



**Supplementary Table S10. Intergenomic similarities of RefSeq phage genomes to vB\_Kpn\_ZCKp20p, calculated by VIRIDIC**

| Genome                                                 | Intergenomic Similarity% |
|--------------------------------------------------------|--------------------------|
| NC_031117.1_Acinetobacter_phage_LZ35                   | 0                        |
| NC_041857.1_Acinetobacter_phage_IME-AB2                | 0                        |
| NC_024785.1_Acinetobacter_phage_YMC-13-01-C62          | 0                        |
| NC_028855.1_Acinetobacter_phage_YMC11/12/R2315         | 0                        |
| NC_031098.1_Acinetobacter_phage_vB_AbaS_TRS1           | 0                        |
| NC_019541.1_Acinetobacter_phage_YMC/09/02/B1251_ABA_BP | 0                        |
| NC_041866.1_Acinetobacter_phage_YMC11/11/R3177         | 0                        |
| NC_031908.1_Pseudoalteromonas_phage_PH1                | 0                        |
| NC_019420.1_Edwardsiella_phage_KF-1_DNA                | 0                        |
| NC_015158.1_Vibrio_phage_ICP2                          | 0                        |
| NC_024791.1_Vibrio_phage_ICP2_2013_A_Haiti             | 0                        |
| NC_027988.2_Citrobacter_phage_CVT22                    | 0                        |
| NC_007808.1_Pseudomonas_phage_PA11                     | 0                        |
| NC_024365.1_Pseudomonas_phage_phiPSA1                  | 0                        |
| NC_030931.1_Pseudomonas_phage_phi2                     | 0                        |
| NC_031091.1_Pseudomonas_phage_MD8                      | 0                        |
| NC_023575.1_Pseudomonas_phage_vB_PaeP_Tr60_Ab31        | 0                        |
| NC_007902.1_Sodalis_phage_phiSG1                       | 0                        |
| NC_004827.1_Bacteriophage_Aaphi23                      | 0                        |
| NC_013597.1_Aggregatibacter_phage_S1249                | 0                        |
| NC_025458.1_Shewanella_sp._phage_1/41                  | 0                        |
| NC_004313.1_Salmonella_phage_ST64B                     | 0                        |
| NC_021857.1_Shigella_phage_SfII                        | 0                        |
| NC_021068.1_Vibrio_phage_douglas_12A4                  | 0                        |
| NC_020844.1_Salicola_phage_CGphi29                     | 0                        |
| NC_019923.1_Pseudomonas_phage_AF                       | 0                        |
| NC_011589.1_Stenotrophomonas_phage_S1                  | 0                        |
| NC_001901.1_Bacteriophage_N15                          | 0                        |
| NC_001901.1_Bacteriophage_N15                          | 0                        |

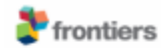

Supplementary Table S11. CoreGene5-identified homologous genes of phage vB\_Kpn\_ZCKp20p and top-matched phages by BLASTn (31 homologous)

| Klebsiella phage vB_Kpn_ZCKp20p    | Klebsiella phage ZCKP8             | Klebsiella phage 6991              | Vibrio phage pYD38-A                      | Aeromonas phage pIS4-A                    | Klebsiella phage VLCpiS13a      | Klebsiella phage BUCT610        | Klebsiella phage vB_KpnS_MK54   | Klebsiella phage VLCpiS13f      | Klebsiella phage vB_KpnS_ZX4                 | Klebsiella virus KpV2811                  | Klebsiella phage VLCpiS13e      | Flyfo siphovirus Tbat1_6                    | Klebsiella phage BUCT541     | Klebsiella phage VLCpiS13c      |
|------------------------------------|------------------------------------|------------------------------------|-------------------------------------------|-------------------------------------------|---------------------------------|---------------------------------|---------------------------------|---------------------------------|----------------------------------------------|-------------------------------------------|---------------------------------|---------------------------------------------|------------------------------|---------------------------------|
| OP373729.1                         | MZ440881.1                         | OL362277.1                         | NC_021534.1                               | NC_042037.1                               | ON602738.1                      | MZ318367.1                      | MW119258.1                      | ON602730.1                      | NC_054654.1                                  | NC_054653.1                               | ON602759.1                      | OL617041.1                                  | MZ836210.1                   | ON602737.1                      |
| UXQ88383.1                         | QYW02877.1                         | URY99606.1                         | YP_008126213.1                            | YP_009614601.1                            | UVX30255.1                      | QWX10344.1                      | QZD26098.1                      | UVX29578.1                      | YP_010054559.1                               | YP_010054492.1                            | UVX31619.1                      | UIW10248.1                                  | UAW06819.1                   | UVX30173.1                      |
| Product:hypothetical protein       | Product:hypothetical protein       | Product:hypothetical protein       | Product:hypothetical protein              | Product:hypothetical protein              | Product:hypothetical protein    | Product:hypothetical protein    | Product:hypothetical protein    | Product:hypothetical protein    | Product:hypothetical protein                 | Product:hypothetical protein              | Product:hypothetical protein    | Product:hypothetical protein                | Product:hypothetical protein | Product:hypothetical protein    |
| UXQ88392.1                         | QYW02885.1                         | URY99535.1                         | YP_008126205.1                            | YP_009614609.1                            | UVX30262.1                      | QWX10350.1                      | QZD26106.1                      | UVX29571.1                      | YP_010054563.1                               | YP_010054486.1                            | UVX31626.1                      | UIW10230.1                                  | UAW06815.1                   | UVX30164.1                      |
| Product:hypothetical protein       | Product:hypothetical protein       | Product:hypothetical protein       | Product:hypothetical protein              | Product:hypothetical protein              | Product:hypothetical protein    | Product:hypothetical protein    | Product:hypothetical protein    | Product:hypothetical protein    | Product:hypothetical protein                 | Product:hypothetical protein              | Product:hypothetical protein    | Product:hypothetical protein                | Product:hypothetical protein | Product:hypothetical protein    |
| UXQ88393.1                         | QYW02886.1                         | URY99536.1                         | YP_008126204.1                            | YP_009614610.1                            | UVX30263.1                      | QWX10352.1                      | QZD26107.1                      | UVX29570.1                      | YP_010054565.1                               | YP_010054485.1                            | UVX31628.1                      | UIW10204.1                                  | UAW06891.1                   | UVX30162.1                      |
| Product:terminase large subunit    | Product:large terminase subunit    | Product:terminase large subunit    | Product:large terminase subunit           | Product:terminase                         | Product:terminase large subunit | Product:large terminase subunit | Product:large terminase subunit | Product:terminase large subunit | Product:PBS X family terminase large subunit | Product:terminase large subunit           | Product:terminase large subunit | Product:terminase large subunit             | Product:large terminase      | Product:terminase large subunit |
| UXQ88394.1                         | QYW02928.1                         | URY99538.1                         | YP_008126203.1                            | YP_009614611.1                            | UVX30264.1                      | QWX10271.1                      | QZD26108.1                      | UVX29568.1                      | YP_010054494.1                               | YP_010054484.1                            | UVX31630.1                      | UIW10242.1                                  | UAW06890.1                   | UVX30161.1                      |
| Product:hypothetical protein       | Product:hypothetical protein       | Product:hypothetical protein       | Product:hypothetical protein              | Product:hypothetical protein              | Product:hypothetical protein    | Product:hypothetical protein    | Product:hypothetical protein    | Product:hypothetical protein    | Product:hypothetical protein                 | Product:hypothetical protein              | Product:hypothetical protein    | Product:hypothetical protein                | Product:hypothetical protein | Product:hypothetical protein    |
| UXQ88395.1                         | QYW02887.1                         | URY99539.1                         | YP_008126202.1                            | YP_009614612.1                            | UVX30265.1                      | QWX10272.1                      | QZD26109.1                      | UVX29567.1                      | YP_010054495.1                               | YP_010054483.1                            | UVX31631.1                      | UIW10258.1                                  | UAW06889.1                   | UVX30160.1                      |
| Product:hypothetical protein       | Product:hypothetical protein       | Product:hypothetical protein       | Product:hypothetical protein              | Product:hypothetical protein              | Product:hypothetical protein    | Product:hypothetical protein    | Product:hypothetical protein    | Product:hypothetical protein    | Product:hypothetical protein                 | Product:hypothetical protein              | Product:hypothetical protein    | Product:hypothetical protein                | Product:hypothetical protein | Product:hypothetical protein    |
| UXQ88401.1                         | QYW02893.1                         | URY99544.1                         | YP_008126197.1                            | YP_009614617.1                            | UVX30272.1                      | QWX10279.1                      | QZD26115.1                      | UVX29561.1                      | YP_010054497.1                               | YP_010054478.1                            | UVX31635.1                      | UIW10203.1                                  | UAW06885.1                   | UVX30155.1                      |
| Product:portal (connector) protein | Product:portal (connector) protein | Product:portal (connector) protein | Product:DUF1073 domain-containing protein | Product:DUF1073 domain-containing protein | Product:portal protein          | Product:portal protein          | Product:portal protein          | Product:portal protein          | Product:DUF1073 domain-containing protein    | Product:DUF1073 domain-containing protein | Product:portal protein          | Product:protein of unknown function DUF1073 | Product:hypothetical protein | Product:portal protein          |
| UXQ88402.1                         | QYW02895.1                         | URY99545.1                         | YP_008126196.1                            | YP_009614618.1                            | UVX30273.1                      | QWX10280.1                      | QZD26116.1                      | UVX29560.1                      | YP_010054498.1                               | YP_010054477.1                            | UVX31636.1                      | UIW10207.1                                  | UAW06884.1                   | UVX30153.1                      |
| Product:minor capsid protein       | Product:head decoration protein    | Product:hypothetical protein       | Product:hypothetical protein              | Product:hypothetical protein              | Product:head morphogenesis      | Product:hypothetical protein    | Product:minor capsid protein    | Product:head morphogenesis      | Product:hypothetical protein                 | Product:hypothetical protein              | Product:head morphogenesis      | Product:hypothetical protein                | Product:hypothetical protein | Product:head morphogenesis      |
| UXQ88406.1                         | QYW02932.1                         | URY99549.1                         | YP_008126193.1                            | YP_009614621.1                            | UVX30276.1                      | QWX10284.1                      | QZD26120.1                      | UVX29557.1                      | YP_010054502.1                               | YP_010054472.1                            | UVX31640.1                      | UIW10244.1                                  | UAW06881.1                   | UVX30150.1                      |
| Product:hypothetical protein       | Product:hypothetical protein       | Product:hypothetical protein       | Product:hypothetical protein              | Product:hypothetical protein              | Product:hypothetical protein    | Product:hypothetical protein    | Product:hypothetical protein    | Product:hypothetical protein    | Product:hypothetical protein                 | Product:hypothetical protein              | Product:hypothetical protein    | Product:hypothetical protein                | Product:hypothetical protein | Product:hypothetical protein    |
| UXQ88407.1                         | QYW02896.1                         | URY99550.1                         | YP_008126192.1                            | YP_009614622.1                            | UVX30277.1                      | QWX10285.1                      | QZD26122.1                      | UVX29556.1                      | YP_010054503.1                               | YP_010054471.1                            | UVX31641.1                      | UIW10247.1                                  | UAW06880.1                   | UVX30149.1                      |
| Product:endolysin                  | Product:lysozyme                   | Product:lysozyme R                 | Product:lysozyme                          | Product:hypothetical protein              | Product:endolysin               | Product:lysozyme                | Product:lysozyme                | Product:lysozyme                | Product:lysozyme                             | Product:lysozyme                          | Product:endolysin               | Product:hypothetical protein                | Product:lysozyme             | Product:endolysin               |



Supplementary Table S11. CoreGene5-identified homologous genes of phage vB\_Kpn\_ZCKp20p and top-matched phages by BLASTn (31 homologous)

| Klebsiella phage vB_Kpn_ZCKp20p                | Klebsiella phage ZCKP8       | Klebsiella phage 6991        | Vibrio phage pYD38-A           | Aeromonas phage pIS4-A         | Klebsiella phage VLCpiS13a                  | Klebsiella phage BUCT610                    | Klebsiella phage vB_KpnS_MK54                  | Klebsiella phage VLCpiS13f                  | Klebsiella phage vB_KpnS_ZX4   | Klebsiella virus KpV2811     | Klebsiella phage VLCpiS13e                  | Flyfo siphovirus Tbat1_6                    | Klebsiella phage BUCT541     | Klebsiella phage VLCpiS13c                  |
|------------------------------------------------|------------------------------|------------------------------|--------------------------------|--------------------------------|---------------------------------------------|---------------------------------------------|------------------------------------------------|---------------------------------------------|--------------------------------|------------------------------|---------------------------------------------|---------------------------------------------|------------------------------|---------------------------------------------|
| OP373729.1                                     | MZ440881.1                   | OL362277.1                   | NC_021534.1                    | NC_042037.1                    | ON602738.1                                  | MZ318367.1                                  | MW119258.1                                     | ON602730.1                                  | NC_054654.1                    | NC_054653.1                  | ON602759.1                                  | OL617041.1                                  | MZ836210.1                   | ON602737.1                                  |
| UXQ88413.1                                     | QYW02936.1                   | URY99554.1                   | YP_008126189.1                 | YP_009614625.1                 | UVX30283.1                                  | QWX10290.1                                  | QZD26047.1                                     | UVX29549.1                                  | YP_010054507.1                 | YP_010054466.1               | UVX31647.1                                  | UIW10220.1                                  | UAW06874.1                   | UVX30143.1                                  |
| Product:hypothetical protein                   | Product:hypothetical protein | Product:hypothetical protein | Product:hypothetical protein   | Product:hypothetical protein   | Product:hypothetical protein                | Product:hypothetical protein                | Product:hypothetical protein                   | Product:hypothetical protein                | Product:hypothetical protein   | Product:hypothetical protein | Product:hypothetical protein                | Product:hypothetical protein                | Product:hypothetical protein | Product:hypothetical protein                |
| UXQ88415.1                                     | QYW02937.1                   | URY99556.1                   | YP_008126187.1                 | YP_009614627.1                 | UVX30285.1                                  | QWX10291.1                                  | QZD26049.1                                     | UVX29547.1                                  | YP_010054508.1                 | YP_010054465.1               | UVX31649.1                                  | UIW10267.1                                  | UAW06873.1                   | UVX30141.1                                  |
| Product:hypothetical protein                   | Product:holin                | Product:hypothetical protein | Product:hypothetical protein   | Product:hypothetical protein   | Product:hypothetical protein                | Product:hypothetical protein                | Product:hypothetical protein                   | Product:hypothetical protein                | Product:hypothetical protein   | Product:hypothetical protein | Product:hypothetical protein                | Product:hypothetical protein                | Product:hypothetical protein | Product:hypothetical protein                |
| UXQ88416.1                                     | QYW02899.1                   | URY99557.1                   | YP_008126186.1                 | YP_009614628.1                 | UVX30286.1                                  | QWX10292.1                                  | QZD26050.1                                     | UVX29546.1                                  | YP_010054509.1                 | YP_010054463.1               | UVX31650.1                                  | UIW10263.1                                  | UAW06872.1                   | UVX30140.1                                  |
| Product:hypothetical protein                   | Product:hypothetical protein | Product:hypothetical protein | Product:hypothetical protein   | Product:hypothetical protein   | Product:hypothetical protein                | Product:hypothetical protein                | Product:hypothetical protein                   | Product:hypothetical protein                | Product:hypothetical protein   | Product:hypothetical protein | Product:hypothetical protein                | Product:hypothetical protein                | Product:hypothetical protein | Product:hypothetical protein                |
| UXQ88420.1                                     | QYW02903.1                   | URY99561.1                   | YP_008126182.1                 | YP_009614632.1                 | UVX30210.1                                  | QWX10296.1                                  | QZD26053.1                                     | UVX29542.1                                  | YP_010054513.1                 | YP_010054459.1               | UVX31653.1                                  | UIW10226.1                                  | UAW06868.1                   | UVX30136.1                                  |
| Product:hypothetical protein                   | Product:hypothetical protein | Product:hypothetical protein | Product:hypothetical protein   | Product:hypothetical protein   | Product:MarR family transcription regulator | Product:hypothetical protein                | Product:hypothetical protein                   | Product:MarR family transcription regulator | Product:hypothetical protein   | Product:hypothetical protein | Product:MarR family transcription regulator | Product:hypothetical protein                | Product:transcription factor | Product:MarR family transcription regulator |
| UXQ88422.1                                     | QYW02905.1                   | URY99563.1                   | YP_008126180.1                 | YP_009614634.1                 | UVX30212.1                                  | QWX10298.1                                  | QZD26055.1                                     | UVX29540.1                                  | YP_010054515.1                 | YP_010054457.1               | UVX31655.1                                  | UIW10237.1                                  | UAW06866.1                   | UVX30134.1                                  |
| Product:hypothetical protein                   | Product:hypothetical protein | Product:hypothetical protein | Product:hypothetical protein   | Product:hypothetical protein   | Product:hypothetical protein                | Product:hypothetical protein                | Product:hypothetical protein                   | Product:hypothetical protein                | Product:hypothetical protein   | Product:hypothetical protein | Product:hypothetical protein                | Product:hypothetical protein                | Product:hypothetical protein | Product:hypothetical protein                |
| UXQ88423.1                                     | QYW02907.1                   | URY99564.1                   | YP_008126179.1                 | YP_009614635.1                 | UVX30213.1                                  | QWX10299.1                                  | QZD26056.1                                     | UVX29539.1                                  | YP_010054516.1                 | YP_010054456.1               | UVX31656.1                                  | UIW10205.1                                  | UAW06865.1                   | UVX30133.1                                  |
| Product:procapsid core protein serine protease | Product:hypothetical protein | Product:coat protein         | Product:hypothetical protein   | Product:hypothetical protein   | Product:hypothetical protein                | Product:coat protein                        | Product:procapsid core protein serine protease | Product:hypothetical protein                | Product:coat protein           | Product:hypothetical protein | Product:hypothetical protein                | Product:hypothetical protein                | Product:hypothetical protein | Product:hypothetical protein                |
| UXQ88425.1                                     | QYW02909.1                   | URY99566.1                   | YP_008126177.1                 | YP_009614637.1                 | UVX30215.1                                  | QWX10301.1                                  | QZD26058.1                                     | UVX29537.1                                  | YP_010054518.1                 | YP_010054454.1               | UVX31658.1                                  | UIW10206.1                                  | UAW06863.1                   | UVX30131.1                                  |
| Product:major capsid protein                   | Product:major coat protein   | Product:coat protein         | Product:DUF6260 family protein | Product:DUF6260 family protein | Product:virion structural protein           | Product:protein of unknown function DUF2184 | Product:major capsid protein                   | Product:virion structural protein           | Product:DUF6260 family protein | Product:hypothetical protein | Product:virion structural protein           | Product:protein of unknown function DUF6260 | Product:coat protein         | Product:virion structural protein           |
| UXQ88435.1                                     | QYW02940.1                   | URY99571.1                   | YP_008126171.1                 | YP_009614643.1                 | UVX30220.1                                  | QWX10306.1                                  | QZD26062.1                                     | UVX29534.1                                  | YP_010054521.1                 | YP_010054450.1               | UVX31662.1                                  | UIW10276.1                                  | UAW06859.1                   | UVX30205.1                                  |
| Product:hypothetical protein                   | Product:hypothetical protein | Product:hypothetical protein | Product:hypothetical protein   | Product:hypothetical protein   | Product:hypothetical protein                | Product:hypothetical protein                | Product:hypothetical protein                   | Product:hypothetical protein                | Product:hypothetical protein   | Product:hypothetical protein | Product:hypothetical protein                | Product:hypothetical protein                | Product:hypothetical protein | Product:hypothetical protein                |
| UXQ88431.1                                     | QYW02942.1                   | URY99573.1                   | YP_008126170.1                 | YP_009614644.1                 | UVX30222.1                                  | QWX10308.1                                  | QZD26064.1                                     | UVX29532.1                                  | YP_010054524.1                 | YP_010054447.1               | UVX31664.1                                  | UIW10212.1                                  | UAW06856.1                   | UVX30203.1                                  |



Supplementary Table S11. CoreGene5-identified homologous genes of phage vB\_Kpn\_ZCKp20p and top-matched phages by BLASTn (31 homologous)

| Klebsiella phage vB_Kpn_ZCKp20p | Klebsiella phage ZCKP8                     | Klebsiella phage 6991        | Vibrio phage pYD38-A             | Aeromonas phage pIS4-A           | Klebsiella phage VLCpiS13a               | Klebsiella phage BUCT610     | Klebsiella phage vB_KpnS_MK54              | Klebsiella phage VLCpiS13f          | Klebsiella phage vB_KpnS_ZX4     | Klebsiella virus KpV2811                        | Klebsiella phage VLCpiS13e          | Flyfo siphovirus Tbat1_6                    | Klebsiella phage BUCT541     | Klebsiella phage VLCpiS13c               |
|---------------------------------|--------------------------------------------|------------------------------|----------------------------------|----------------------------------|------------------------------------------|------------------------------|--------------------------------------------|-------------------------------------|----------------------------------|-------------------------------------------------|-------------------------------------|---------------------------------------------|------------------------------|------------------------------------------|
| OP373729.1                      | MZ440881.1                                 | OL362277.1                   | NC_021534.1                      | NC_042037.1                      | ON602738.1                               | MZ318367.1                   | MW119258.1                                 | ON602730.1                          | NC_054654.1                      | NC_054653.1                                     | ON602759.1                          | OL617041.1                                  | MZ836210.1                   | ON602737.1                               |
| Product:hypothetical protein    | Product:putative transcriptional regulator | Product:hypothetical protein | Product:hypothetical protein     | Product:hypothetical protein     | Product:hypothetical protein             | Product:hypothetical protein | Product:putative transcriptional regulator | Product:ParB-like partition protein | Product:hypothetical protein     | Product:ParB/RepB/SpoJ family partition protein | Product:ParB-like partition protein | Product:KorB domain protein                 | Product:hypothetical protein | Product:ParB-like partition protein      |
| UXQ88434.1                      | QYW02912.1                                 | URY99576.1                   | YP_008126168.1                   | YP_009614646.1                   | UVX30223.1                               | QWX10311.1                   | QZD26068.1                                 | UVX29528.1                          | YP_010054527.1                   | YP_010054444.1                                  | UVX31588.1                          | UIW10245.1                                  | UAW06853.1                   | UVX30200.1                               |
| Product:holin protein           | Product:hypothetical protein               | Product:hypothetical protein | Product:hypothetical protein     | Product:hypothetical protein     | Product:membrane protein                 | Product:hypothetical protein | Product:holin                              | Product:membrane protein            | Product:hypothetical protein     | Product:hypothetical protein                    | Product:membrane protein            | Product:hypothetical protein                | Product:hypothetical protein | Product:membrane protein                 |
| UXQ88436.1                      | QYW02913.1                                 | URY99577.1                   | YP_008126167.1                   | YP_009614647.1                   | UVX30224.1                               | QWX10312.1                   | QZD26069.1                                 | UVX29527.1                          | YP_010054528.1                   | YP_010054443.1                                  | UVX31589.1                          | UIW10235.1                                  | UAW06852.1                   | UVX30199.1                               |
| Product:hypothetical protein    | Product:hypothetical protein               | Product:hypothetical protein | Product:hypothetical protein     | Product:hypothetical protein     | Product:hypothetical protein             | Product:hypothetical protein | Product:head to tail adaptor               | Product:hypothetical protein        | Product:hypothetical protein     | Product:hypothetical protein                    | Product:hypothetical protein        | Product:hypothetical protein                | Product:hypothetical protein | Product:hypothetical protein             |
| UXQ88438.1                      | QYW02915.1                                 | URY99579.1                   | YP_008126166.1                   | YP_009614648.1                   | UVX30226.1                               | QWX10313.1                   | QZD26070.1                                 | UVX29526.1                          | YP_010054530.1                   | YP_010054441.1                                  | UVX31591.1                          | UIW10236.1                                  | UAW06850.1                   | UVX30197.1                               |
| Product:minor capsid protein    | Product:hypothetical protein               | Product:hypothetical protein | Product:hypothetical protein     | Product:hypothetical protein     | Product:hypothetical protein             | Product:hypothetical protein | Product:minor capsid protein               | Product:hypothetical protein        | Product:hypothetical protein     | Product:hypothetical protein                    | Product:hypothetical protein        | Product:hypothetical protein                | Product:minor capsid protein | Product:hypothetical protein             |
| UXQ88439.1                      | QYW02916.1                                 | URY99580.1                   | YP_008126165.1                   | YP_009614649.1                   | UVX30227.1                               | QWX10314.1                   | QZD26071.1                                 | UVX29525.1                          | YP_010054531.1                   | YP_010054440.1                                  | UVX31592.1                          | UIW10232.1                                  | UAW06849.1                   | UVX30196.1                               |
| Product:minor capsid protein    | Product:hypothetical protein               | Product:hypothetical protein | Product:HK97 gp10 family protein | Product:HK97 gp10 family protein | Product:tail completion or Neck1 protein | Product:hypothetical protein | Product:minor capsid protein               | Product:hypothetical protein        | Product:HK97 gp10 family protein | Product:HK97 gp10 family protein                | Product:hypothetical protein        | Product:hypothetical protein                | Product:hypothetical protein | Product:tail completion or Neck1 protein |
| UXQ88441.1                      | QYW02917.1                                 | URY99581.1                   | YP_008126240.1                   | YP_009614650.1                   | UVX30228.1                               | QWX10315.1                   | QZD26072.1                                 | UVX29524.1                          | YP_010054532.1                   | YP_010054439.1                                  | UVX31593.1                          | UIW10234.1                                  | UAW06848.1                   | UVX30195.1                               |
| Product:minor capsid protein    | Product:hypothetical protein               | Product:hypothetical protein | Product:hypothetical protein     | Product:hypothetical protein     | Product:hypothetical protein             | Product:hypothetical protein | Product:tail completion protein            | Product:hypothetical protein        | Product:hypothetical protein     | Product:hypothetical protein                    | Product:hypothetical protein        | Product:hypothetical protein                | Product:hypothetical protein | Product:hypothetical protein             |
| UXQ88442.1                      | QYW02919.1                                 | URY99583.1                   | YP_008126238.1                   | YP_009614652.1                   | UVX30229.1                               | QWX10318.1                   | QZD26073.1                                 | UVX29523.1                          | YP_010054534.1                   | YP_010054437.1                                  | UVX31595.1                          | UIW10213.1                                  | UAW06845.1                   | UVX30194.1                               |
| Product:fibrin protein          | Product:major tail subunit                 | Product:hypothetical protein | Product:major tail subunit       | Product:hypothetical protein     | Product:major tail protein               | Product:hypothetical protein | Product:major tail subunit                 | Product:major tail protein          | Product:hypothetical protein     | Product:hypothetical protein                    | Product:major tail protein          | Product:Immunoglobulin domain protein       | Product:major tail protein   | Product:major tail protein               |
| UXQ88447.1                      | QYW02920.1                                 | URY99588.1                   | YP_008126234.1                   | YP_009614656.1                   | UVX30234.1                               | QWX10324.1                   | QZD26077.1                                 | UVX29518.1                          | YP_010054540.1                   | YP_010054430.1                                  | UVX31600.1                          | UIW10216.1                                  | UAW06839.1                   | UVX30189.1                               |
| Product:putative tail protein   | Product:hypothetical protein               | Product:hypothetical protein | Product:DUF6246 family protein   | Product:DUF6246 family protein   | Product:hypothetical protein             | Product:hypothetical protein | Product:hypothetical protein               | Product:hypothetical protein        | Product:DUF6246 family protein   | Product:DUF6246 family protein                  | Product:hypothetical protein        | Product:protein of unknown function DUF6246 | Product:hypothetical protein | Product:hypothetical protein             |
| UXQ88448.1                      | QYW02921.1                                 | URY99589.1                   | YP_008126233.1                   | YP_009614657.1                   | UVX30235.1                               | QWX10325.1                   | QZD26078.1                                 | UVX29517.1                          | YP_010054541.1                   | YP_010054429.1                                  | UVX31601.1                          | UIW10199.1                                  | UAW06838.1                   | UVX30188.1                               |

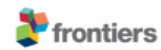

**Supplementary Table S11. CoreGene5-identified homologous genes of phage vB\_Kpn\_ZCKp20p and top-matched phages by BLASTn (31 homologous)**

| Klebsiella phage vB_Kpn_ZCKp20p                  | Klebsiella phage ZCKP8                      | Klebsiella phage 6991                      | Vibrio phage pYD38-A                        | Aeromonas phage pIS4-A                      | Klebsiella phage VLCpiS13a                | Klebsiella phage BUCT610                    | Klebsiella phage vB_KpnS_MK54               | Klebsiella phage VLCpiS13f                | Klebsiella phage vB_KpnS_ZX4                  | Klebsiella virus KpV2811                      | Klebsiella phage VLCpiS13e                | Flyfo siphovirus Tbat1_6                             | Klebsiella phage BUCT541                      | Klebsiella phage VLCpiS13c                |
|--------------------------------------------------|---------------------------------------------|--------------------------------------------|---------------------------------------------|---------------------------------------------|-------------------------------------------|---------------------------------------------|---------------------------------------------|-------------------------------------------|-----------------------------------------------|-----------------------------------------------|-------------------------------------------|------------------------------------------------------|-----------------------------------------------|-------------------------------------------|
| OP373729.1                                       | MZ440881.1                                  | OL362277.1                                 | NC_021534.1                                 | NC_042037.1                                 | ON602738.1                                | MZ318367.1                                  | MW119258.1                                  | ON602730.1                                | NC_054654.1                                   | NC_054653.1                                   | ON602759.1                                | OL617041.1                                           | MZ836210.1                                    | ON602737.1                                |
| Product:tail tape measure protein                | Product:tail length tape measure protein    | Product:tail length tape-measure protein T | Product:tail length tape measure protein    | Product:tail length tape measure protein    | Product:tail length tape measure protein  | Product:tail length tape measure protein    | Product:putative tail protein               | Product:tail length tape measure protein  | Product:tail length tape-measure protein 1    | Product:tail length tape-measure protein      | Product:tail length tape measure protein  | Product:tape measure protein                         | Product:tail length tape-measure protein 1    | Product:tail length tape measure protein  |
| UXQ88449.1                                       | QYW02922.1                                  | URY99590.1                                 | YP_008126232.1                              | YP_009614658.1                              | UVX30238.1                                | QWX10326.1                                  | QZD26079.1                                  | UVX29515.1                                | YP_010054542.1                                | YP_010054428.1                                | UVX31603.1                                | UIW10225.1                                           | UAW06837.1                                    | UVX30187.1                                |
| Product:baseplate wedge protein                  | Product:minor tail protein                  | Product:hypohetical protein                | Product:hypohetical protein                 | Product:hypohetical protein                 | Product:virion structural protein         | Product:hypohetical protein                 | Product:minor tail protein                  | Product:virion structural protein         | Product:hypohetical protein                   | Product:hypohetical protein                   | Product:virion structural protein         | Product:hypohetical protein                          | Product:hypohetical protein                   | Product:virion structural protein         |
| UXQ88450.1                                       | QYW02923.1                                  | URY99591.1                                 | YP_008126231.1                              | YP_009614659.1                              | UVX30239.1                                | QWX10327.1                                  | QZD26080.1                                  | UVX29514.1                                | YP_010054543.1                                | YP_010054427.1                                | UVX31604.1                                | UIW10227.1                                           | UAW06836.1                                    | UVX30186.1                                |
| Product:hypohetical protein                      | Product:hypohetical protein                 | Product:hypohetical protein                | Product:hypohetical protein                 | Product:hypohetical protein                 | Product:minor tail protein                | Product:hypohetical protein                 | Product:hypohetical protein                 | Product:minor tail protein                | Product:hypohetical protein                   | Product:hypohetical protein                   | Product:minor tail protein                | Product:hypohetical protein                          | Product:hypohetical protein                   | Product:minor tail protein                |
| UXQ88451.1                                       | QYW02925.1                                  | URY99593.1                                 | YP_008126229.1                              | YP_009614661.1                              | UVX30241.1                                | QWX10329.1                                  | QZD26082.1                                  | UVX29512.1                                | YP_010054545.1                                | YP_010054426.1                                | UVX31606.1                                | UIW10198.1                                           | UAW06834.1                                    | UVX30184.1                                |
| Product:host specificity factor TipJ family tail | Product:putative tail protein               | Product:hypohetical protein                | Product:MoAD/ThiS family protein            | Product:MoAD/ThiS family protein            | Product:tail protein                      | Product:hypohetical protein                 | Product:tail protein                        | Product:tail protein                      | Product:MoAD/ThiS family protein              | Product:MoAD/ThiS family protein              | Product:tail protein                      | Product:hypohetical protein                          | Product:hypohetical protein                   | Product:tail protein                      |
| UXQ88454.1                                       | QYW02950.1                                  | URY99597.1                                 | YP_008126226.1                              | YP_009614664.1                              | UVX30243.1                                | QWX10332.1                                  | QZD26084.1                                  | UVX29591.1                                | YP_010054547.1                                | YP_010054424.1                                | UVX31608.1                                | UIW10224.1                                           | UAW06832.1                                    | UVX30180.1                                |
| Product:single stranded DNA-binding protein      | Product:single stranded DNA-binding protein | Product:hypohetical protein                | Product:single stranded DNA-binding protein | Product:single stranded DNA-binding protein | Product:single strand DNA binding protein | Product:single stranded DNA-binding protein | Product:single stranded DNA-binding protein | Product:single strand DNA binding protein | Product:single stranded DNA-binding protein   | Product:single stranded DNA-binding protein   | Product:single strand DNA binding protein | Product:single strand binding protein family protein | Product:single strand binding protein         | Product:single strand DNA binding protein |
| UXQ88460.1                                       | QYW02955.1                                  | URY99596.1                                 | YP_008126221.1                              | YP_009614669.1                              | UVX30247.1                                | QWX10337.1                                  | QZD26089.1                                  | UVX29586.1                                | YP_010054552.1                                | YP_010054420.1                                | UVX31613.1                                | UIW10201.1                                           | UAW06827.1                                    | UVX30181.1                                |
| Product:DNA helicase                             | Product:DNA helicase                        | Product:ATP-dependent RNA helicase         | Product:helicase                            | Product:helicase                            | Product:DNA helicase                      | Product:DNA helicase                        | Product:DNA helicase                        | Product:DNA helicase                      | Product:DEAD/DEAH box helicase family protein | Product:DEAD/DEAH box helicase family protein | Product:DNA helicase                      | Product:DNA helicase                                 | Product:DEAD/DEAH box helicase family protein | Product:DNA helicase                      |

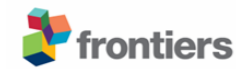

Supplementary Table S12. CoreGene5-identified homologous genes of phage vB\_Kpn\_ZCKp20p, phage ZCKP8, and phage 6991 (64 homologs)

| Klebsiella phage ZCKp20p           | Klebsiella phage ZCKP8             | Klebsiella phage 6991              |
|------------------------------------|------------------------------------|------------------------------------|
| OP373729.1                         | MZ440881.1                         | OL362277.1                         |
| PI:UXQ88382.1                      | PI:QYW02876.1                      | PI:URY99605.1                      |
| Product:hypothetical protein       | Product:hypothetical protein       | Product:hypothetical protein       |
| PI:UXQ88383.1                      | PI:QYW02877.1                      | PI:URY99606.1                      |
| Product:hypothetical protein       | Product:hypothetical protein       | Product:hypothetical protein       |
| PI:UXQ88384.1                      | PI:QYW02878.1                      | PI:URY99607.1                      |
| Product:hypothetical protein       | Product:hypothetical protein       | Product:hypothetical protein       |
| PI:UXQ88385.1                      | PI:QYW02879.1                      | PI:URY99608.1                      |
| Product:hypothetical protein       | Product:hypothetical protein       | Product:hypothetical protein       |
| PI:UXQ88386.1                      | PI:QYW02880.1                      | PI:URY99609.1                      |
| Product:hypothetical protein       | Product:hypothetical protein       | Product:hypothetical protein       |
| PI:UXQ88387.1                      | PI:QYW02881.1                      | PI:URY99610.1                      |
| Product:hypothetical protein       | Product:hypothetical protein       | Product:hypothetical protein       |
| PI:UXQ88388.1                      | PI:QYW02882.1                      | PI:URY99611.1                      |
| Product:hypothetical protein       | Product:hypothetical protein       | Product:EaA protein                |
| PI:UXQ88390.1                      | PI:QYW02883.1                      | PI:URY99613.1                      |
| Product:hypothetical protein       | Product:hypothetical protein       | Product:hypothetical protein       |
| PI:UXQ88391.1                      | PI:QYW02884.1                      | PI:URY99614.1                      |
| Product:hypothetical protein       | Product:hypothetical protein       | Product:hypothetical protein       |
| PI:UXQ88392.1                      | PI:QYW02885.1                      | PI:URY99535.1                      |
| Product:hypothetical protein       | Product:hypothetical protein       | Product:hypothetical protein       |
| PI:UXQ88393.1                      | PI:QYW02886.1                      | PI:URY99536.1                      |
| Product:terminase large subunit    | Product:large terminase subunit    | Product:terminase large subunit    |
| PI:UXQ88394.1                      | PI:QYW02928.1                      | PI:URY99538.1                      |
| Product:hypothetical protein       | Product:hypothetical protein       | Product:hypothetical protein       |
| PI:UXQ88395.1                      | PI:QYW02887.1                      | PI:URY99539.1                      |
| Product:hypothetical protein       | Product:hypothetical protein       | Product:hypothetical protein       |
| PI:UXQ88396.1                      | PI:QYW02889.1                      | PI:URY99540.1                      |
| Product:hypothetical protein       | Product:hypothetical protein       | Product:hypothetical protein       |
| PI:UXQ88398.1                      | PI:QYW02891.1                      | PI:URY99542.1                      |
| Product:hypothetical protein       | Product:hypothetical protein       | Product:hypothetical protein       |
| PI:UXQ88401.1                      | PI:QYW02893.1                      | PI:URY99544.1                      |
| Product:portal (connector) protein | Product:portal (connector) protein | Product:portal (connector) protein |
| PI:UXQ88402.1                      | PI:QYW02895.1                      | PI:URY99545.1                      |



Supplementary Table S12. CoreGene5-identified homologous genes of phage vB\_Kpn\_ZCKp20p, phage ZCKP8, and phage 6991 (64 homologs)

| Klebsiella phage ZCKp20p                              | Klebsiella phage ZCKP8                          | Klebsiella phage 6991        |
|-------------------------------------------------------|-------------------------------------------------|------------------------------|
| <b>OP373729.1</b>                                     | <b>MZ440881.1</b>                               | <b>OL362277.1</b>            |
| Product:minor capsid protein                          | Product:head decoration protein                 | Product:hypothetical protein |
| PI:UXQ88404.1                                         | PI:QYW02930.1                                   | PI:URY99547.1                |
| Product:hypothetical protein                          | Product:hypothetical protein                    | Product:hypothetical protein |
| PI:UXQ88405.1                                         | PI:QYW02931.1                                   | PI:URY99548.1                |
| Product:hypothetical protein                          | Product:hypothetical protein                    | Product:hypothetical protein |
| PI:UXQ88406.1                                         | PI:QYW02932.1                                   | PI:URY99549.1                |
| Product:hypothetical protein                          | Product:hypothetical protein                    | Product:hypothetical protein |
| PI:UXQ88407.1                                         | PI:QYW02896.1                                   | PI:URY99550.1                |
| Product:endolysin                                     | Product:lysozyme                                | Product:lysozyme R           |
| PI:UXQ88408.1                                         | PI:QYW02897.1                                   | PI:URY99551.1                |
| Product:holin protein                                 | Product:putative holin                          | Product:hypothetical protein |
| PI:UXQ88409.1                                         | PI:QYW02898.1                                   | PI:URY99552.1                |
| Product:endopeptidase Rz                              | Product:tail protein                            | Product:lysin                |
| PI:UXQ88412.1                                         | PI:QYW02934.1                                   | PI:URY99553.1                |
| Product:hypothetical protein                          | Product:hypothetical protein                    | Product:hypothetical protein |
| PI:UXQ88413.1                                         | PI:QYW02936.1                                   | PI:URY99554.1                |
| Product:hypothetical protein                          | Product:hypothetical protein                    | Product:hypothetical protein |
| PI:UXQ88415.1                                         | PI:QYW02937.1                                   | PI:URY99556.1                |
| Product:hypothetical protein                          | Product:holin                                   | Product:hypothetical protein |
| PI:UXQ88416.1                                         | PI:QYW02899.1                                   | PI:URY99557.1                |
| Product:hypothetical protein                          | Product:hypothetical protein                    | Product:hypothetical protein |
| PI:UXQ88417.1                                         | PI:QYW02900.1                                   | PI:URY99558.1                |
| Product:hypothetical protein                          | Product:hypothetical protein                    | Product:hypothetical protein |
| PI:UXQ88418.1                                         | PI:QYW02901.1                                   | PI:URY99559.1                |
| Product:hypothetical protein                          | Product:hypothetical protein                    | Product:hypothetical protein |
| PI:UXQ88419.1                                         | PI:QYW02902.1                                   | PI:URY99560.1                |
| Product:zinc-binding domain (ZBD) of primase-helicase | Product:zinc-binding domain of primase-helicase | Product:hypothetical protein |
| PI:UXQ88420.1                                         | PI:QYW02903.1                                   | PI:URY99561.1                |
| Product:hypothetical protein                          | Product:hypothetical protein                    | Product:hypothetical protein |
| PI:UXQ88421.1                                         | PI:QYW02904.1                                   | PI:URY99562.1                |
| Product:hypothetical protein                          | Product:hypothetical protein                    | Product:hypothetical protein |
| PI:UXQ88422.1                                         | PI:QYW02905.1                                   | PI:URY99563.1                |
| Product:hypothetical protein                          | Product:hypothetical protein                    | Product:hypothetical protein |





Supplementary Table S12. CoreGene5-identified homologous genes of phage vB\_Kpn\_ZCKp20p, phage ZCKP8, and phage 6991 (64 homologs)

| Klebsiella phage ZCKp20p                         | Klebsiella phage ZCKP8                     | Klebsiella phage 6991                   |
|--------------------------------------------------|--------------------------------------------|-----------------------------------------|
| OP373729.1                                       | MZ440881.1                                 | OL362277.1                              |
| PI:UXQ88423.1                                    | PI:QYW02907.1                              | PI:URY99564.1                           |
| Product:procapsid core protein serine protease   | Product:hypothetical protein               | Product:coat protein                    |
| PI:UXQ88424.1                                    | PI:QYW02908.1                              | PI:URY99565.1                           |
| Product:capsid decoration protein                | Product:capsid decoration protein          | Product:hypothetical protein            |
| PI:UXQ88425.1                                    | PI:QYW02909.1                              | PI:URY99566.1                           |
| Product:major capsid protein                     | Product:major coat protein                 | Product:coat protein                    |
| PI:UXQ88426.1                                    | PI:QYW02910.1                              | PI:URY99567.1                           |
| Product:hypothetical protein                     | Product:hypothetical protein               | Product:hypothetical protein            |
| PI:UXQ88427.1                                    | PI:QYW02911.1                              | PI:URY99568.1                           |
| Product:hypothetical protein                     | Product:hypothetical protein               | Product:hypothetical protein            |
| PI:UXQ88428.1                                    | PI:QYW02938.1                              | PI:URY99569.1                           |
| Product:hypothetical protein                     | Product:hypothetical protein               | Product:hypothetical protein            |
| PI:UXQ88429.1                                    | PI:QYW02939.1                              | PI:URY99570.1                           |
| Product:DNA polymerase III beta subunit          | Product:DNA polymerase III beta subunit    | Product:DNA polymerase III beta subunit |
| PI:UXQ88435.1                                    | PI:QYW02940.1                              | PI:URY99571.1                           |
| Product:hypothetical protein                     | Product:hypothetical protein               | Product:hypothetical protein            |
| PI:UXQ88430.1                                    | PI:QYW02941.1                              | PI:URY99572.1                           |
| Product:hypothetical protein                     | Product:hypothetical protein               | Product:hypothetical protein            |
| PI:UXQ88431.1                                    | PI:QYW02942.1                              | PI:URY99573.1                           |
| Product:hypothetical protein                     | Product:putative transcriptional regulator | Product:hypothetical protein            |
| PI:UXQ88432.1                                    | PI:QYW02943.1                              | PI:URY99574.1                           |
| Product:ParB/RepB/Spo0J family partition protein | Product:hypothetical protein               | Product:hypothetical protein            |
| PI:UXQ88433.1                                    | PI:QYW02944.1                              | PI:URY99575.1                           |
| Product:hypothetical protein                     | Product:hypothetical protein               | Product:hypothetical protein            |
| PI:UXQ88434.1                                    | PI:QYW02912.1                              | PI:URY99576.1                           |
| Product:holin protein                            | Product:hypothetical protein               | Product:hypothetical protein            |
| PI:UXQ88436.1                                    | PI:QYW02913.1                              | PI:URY99577.1                           |
| Product:hypothetical protein                     | Product:hypothetical protein               | Product:hypothetical protein            |
| PI:UXQ88437.1                                    | PI:QYW02914.1                              | PI:URY99578.1                           |
| Product:hypothetical protein                     | Product:hypothetical protein               | Product:hypothetical protein            |
| PI:UXQ88438.1                                    | PI:QYW02915.1                              | PI:URY99579.1                           |
| Product:minor capsid protein                     | Product:hypothetical protein               | Product:hypothetical protein            |
| PI:UXQ88439.1                                    | PI:QYW02916.1                              | PI:URY99580.1                           |



Supplementary Table S12. CoreGene5-identified homologous genes of phage vB\_Kpn\_ZCKp20p, phage ZCKP8, and phage 6991 (64 homologs)

| Klebsiella phage ZCKp20p                         | Klebsiella phage ZCKP8                      | Klebsiella phage 6991                      |
|--------------------------------------------------|---------------------------------------------|--------------------------------------------|
| OP373729.1                                       | MZ440881.1                                  | OL362277.1                                 |
| Product:minor capsid protein                     | Product:hypothetical protein                | Product:hypothetical protein               |
| PI:UXQ88441.1                                    | PI:QYW02917.1                               | PI:URY99581.1                              |
| Product:minor capsid protein                     | Product:hypothetical protein                | Product:hypothetical protein               |
| PI:UXQ88442.1                                    | PI:QYW02919.1                               | PI:URY99583.1                              |
| Product:fibrin protein                           | Product:major tail subunit                  | Product:hypothetical protein               |
| PI:UXQ88443.1                                    | PI:QYW02946.1                               | PI:URY99584.1                              |
| Product:hypothetical protein                     | Product:hypothetical protein                | Product:hypothetical protein               |
| PI:UXQ88444.1                                    | PI:QYW02947.1                               | PI:URY99585.1                              |
| Product:hypothetical protein                     | Product:hypothetical protein                | Product:hypothetical protein               |
| PI:UXQ88445.1                                    | PI:QYW02948.1                               | PI:URY99586.1                              |
| Product:HNH homing endonuclease                  | Product:HNH-endonuclease                    | Product:HNH endonuclease motif protein     |
| PI:UXQ88446.1                                    | PI:QYW02949.1                               | PI:URY99587.1                              |
| Product:hypothetical protein                     | Product:hypothetical protein                | Product:hypothetical protein               |
| PI:UXQ88447.1                                    | PI:QYW02920.1                               | PI:URY99588.1                              |
| Product:putative tail protein                    | Product:hypothetical protein                | Product:hypothetical protein               |
| PI:UXQ88448.1                                    | PI:QYW02921.1                               | PI:URY99589.1                              |
| Product:tail tape measure protein                | Product:tail length tape measure protein    | Product:tail length tape-measure protein T |
| PI:UXQ88449.1                                    | PI:QYW02922.1                               | PI:URY99590.1                              |
| Product:baseplate wedge protein                  | Product:minor tail protein                  | Product:hypothetical protein               |
| PI:UXQ88450.1                                    | PI:QYW02923.1                               | PI:URY99591.1                              |
| Product:hypothetical protein                     | Product:hypothetical protein                | Product:hypothetical protein               |
| PI:UXQ88451.1                                    | PI:QYW02925.1                               | PI:URY99593.1                              |
| Product:host specificity factor TipJ family tail | Product:putative tail protein               | Product:hypothetical protein               |
| PI:UXQ88452.1                                    | PI:QYW02926.1                               | PI:URY99594.1                              |
| Product:tailspike protein                        | Product:tail fiber protein                  | Product:hypothetical protein               |
| PI:UXQ88454.1                                    | PI:QYW02950.1                               | PI:URY99597.1                              |
| Product:single stranded DNA-binding protein      | Product:single-stranded DNA-binding protein | Product:hypothetical protein               |
| PI:UXQ88460.1                                    | PI:QYW02955.1                               | PI:URY99596.1                              |
| Product:DNA helicase                             | Product:DNA helicase                        | Product:ATP-dependent RNA helicase         |
